# Supplementary material for: Patterns of Forest Species Association in a Broadleaf Forest in Romania
Source: MDPI journal article supplement (doi:10.3390/f14061118), 2023-05-28
Supplement: s1 [file s1]

Supplementary data

The tree species were abbreviated in the analyses: Qr – *Quercus robur*, Cb – *Carpinus betulus*, Tc – *Tilia cordata*, Fe – *Fraxinus excelsior*, Ac – *Acer campestre*, Pa – *Prunus avium*, and Ap – *Acer pseudoplatanus*.

Jaccard co-occurrence index

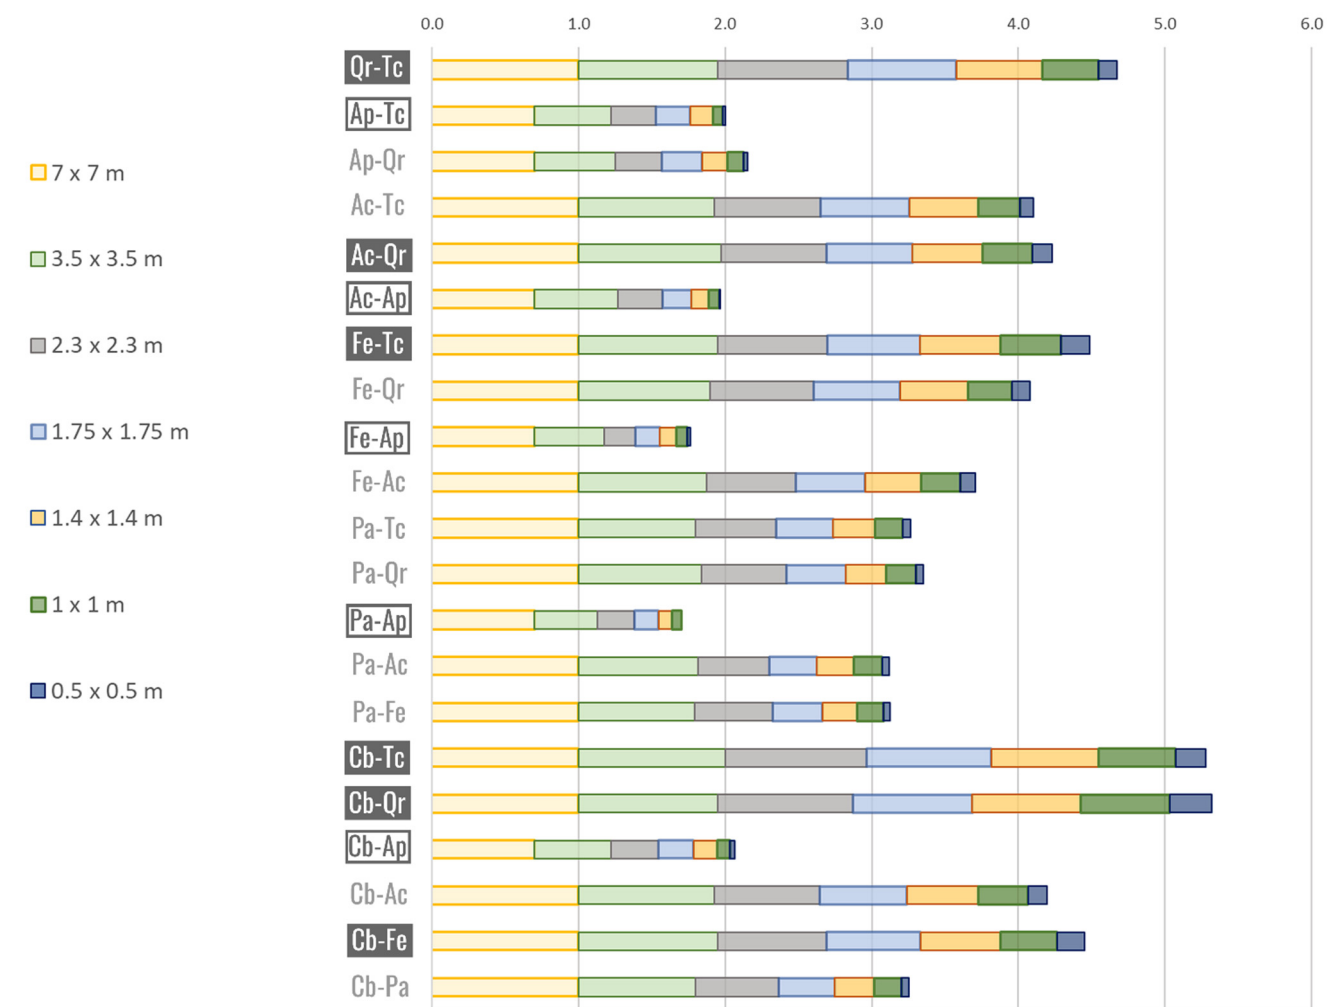

**Figure S1.** The variation of cumulative values of the Jaccard co-occurrence index describing pair-species associations for different quadrat sizes

**Note.** Species relationships with the most significant positive associations are marked with solid dark-grey labels, and those with the most significant negative associations are with white labels.

**Table S1. The species compositions of the plots**

| Species percentage (%) in the plot                  |      |      |      |      |      |     |     |
|-----------------------------------------------------|------|------|------|------|------|-----|-----|
| Plot                                                | Cb   | Qr   | Tc   | Fe   | Ac   | Pa  | Ap  |
| 1                                                   | 37.5 | 45.0 | 8.5  | 3.0  | 3.5  | 2.0 | 0.5 |
| 2                                                   | 57.5 | 29.0 | 4.0  | 1.0  | 3.5  | 1.0 | 4.0 |
| 3                                                   | 70.0 | 4.0  | 15.0 | 4.5  | 4.5  | 1.0 | 1.0 |
| 4                                                   | 74.5 | 2.5  | 11.5 | 2.0  | 5.5  | 3.0 | 1.0 |
| 5                                                   | 61.0 | 22.0 | 5.0  | 3.0  | 8.0  | 1.0 | 0.0 |
| 6                                                   | 74.0 | 1.5  | 14.0 | 8.0  | 1.5  | 1.0 | 0.0 |
| 7                                                   | 34.0 | 4.5  | 21.0 | 35.0 | 3.5  | 1.5 | 0.5 |
| 8                                                   | 61.0 | 24.0 | 6.0  | 1.5  | 4.5  | 1.0 | 2.0 |
| 9                                                   | 51.0 | 15.0 | 9.5  | 3.0  | 18.5 | 3.0 | 0.0 |
| 10                                                  | 53.0 | 10.0 | 10.0 | 17.5 | 6.0  | 3.5 | 0.0 |
| Percentage of the species<br>for the whole sampling | 55   | 16   | 11   | 9    | 6    | 2   | 1   |

**Table S2. The sapling's average height per species**

|                          | Cb     | Qr    | Tc     | Fe    | Ac     | Pa     | Ap     |
|--------------------------|--------|-------|--------|-------|--------|--------|--------|
| Average height (cm)      | 102.89 | 77.62 | 122.16 | 65.32 | 108.42 | 111.94 | 105.76 |
| Coefficient of variation | 48.8%  | 49.6% | 38.7%  | 56.7% | 41.7%  | 45.8%  | 55.7%  |

**Table S3. Synthesis of information about the parent stand**

|                    | Qr  | Cb  | Tc  | Fe  |
|--------------------|-----|-----|-----|-----|
| Species percentage | 50% | 30% | 10% | 10% |
| Age (years)        | 130 | 110 | 110 | 110 |
| DBH (cm)           | 54  | 38  | 42  | 46  |
| Canopy cover       | 0.6 |     |     |     |

## Principal component analysis

**Table S4.** The explained variance of PCA for different quadrat sizes and the most significant pair-species correlation

| Qdrt. size    | Nr. of qdts. | Proportion of variance |       | Pair-species correlation         |                                           |
|---------------|--------------|------------------------|-------|----------------------------------|-------------------------------------------|
|               |              | PC1                    | PC2   | Positive correlation             | Negative correlation                      |
| 7 × 7 m       | 10           | 35.7%                  | 23.4% | Fe-Tc<br>Pa-Ac<br>Qr-Ap          | Fe-Ap<br>Tc-Ap<br>Cb-Ac<br>Cb-Qr          |
| 3.5 × 3.5 m   | 40           | 30%                    | 19.1% | Fe-Tc<br>Pa-Ac<br>Qr-Ac          | Fe-Ap<br>Tc-Ap<br>Cb-Ac<br>Cb-Qr<br>Pa-Ap |
| 2.33 × 2.33 m | 90           | 27.7%                  | 19.4% | Fe-Tc<br>Pa-Ac<br>Qr-Ac<br>Qr-Ap | Fe-Ap<br>Tc-Ap<br>Cb-Ac<br>Cb-Qr          |
| 1.75 × 1.75 m | 160          | 24%                    | 18.5% | Fe-Tc<br>Pa-Ac<br>Qr-Ac          | Fe-Ap<br>Tc-Ap<br>Cb-Ac<br>Cb-Qr          |
| 1.4 × 1.4 m   | 250          | 21.7%                  | 17.9% | Fe-Tc<br>Pa-Ac                   | Fe-Ap<br>Tc-Ap<br>Cb-Ac<br>Cb-Pa          |
| 1 × 1 m       | 489          | 20.2%                  | 16.7% | Fe-Tc<br>Pa-Ac<br>Qr-Ac<br>Qr-Ap | Fe-Ap<br>Tc-Ap<br>Cb-Ac<br>Cb-Pa          |
| 0.5 × 0.5 m   | 1746         | 17.4%                  | 16.3% | Fe-Tc<br>Pa-Ac<br>Qr-Ac          | Fe-Ap<br>Tc-Ap<br>Cb-Qr<br>Cb-Ac          |

**Biplots of the principal component analysis on the species' local abundance**

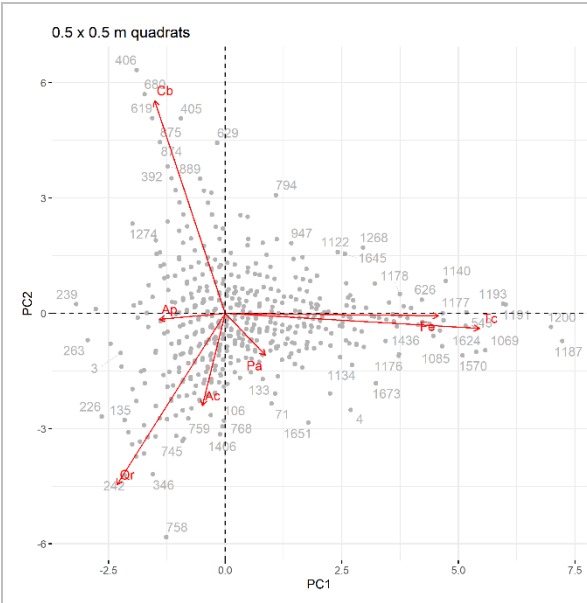

**Figure S2.** PCA biplot – 0.5 × 0.5 m quadrats

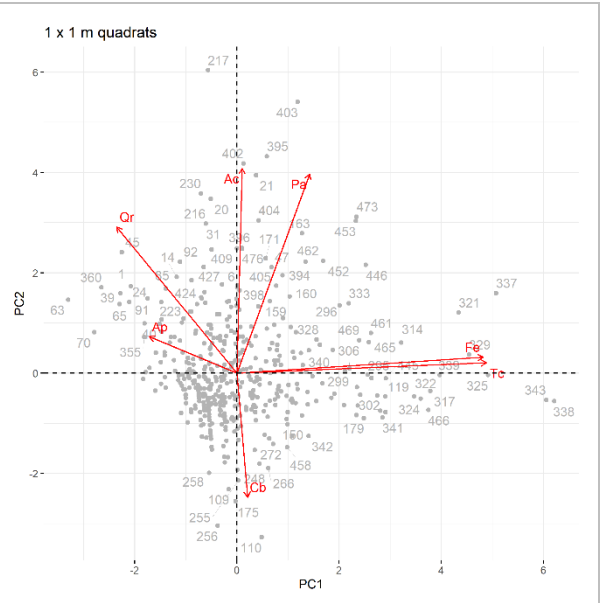

**Figure S3.** PCA biplot – 1 × 1 m quadrats

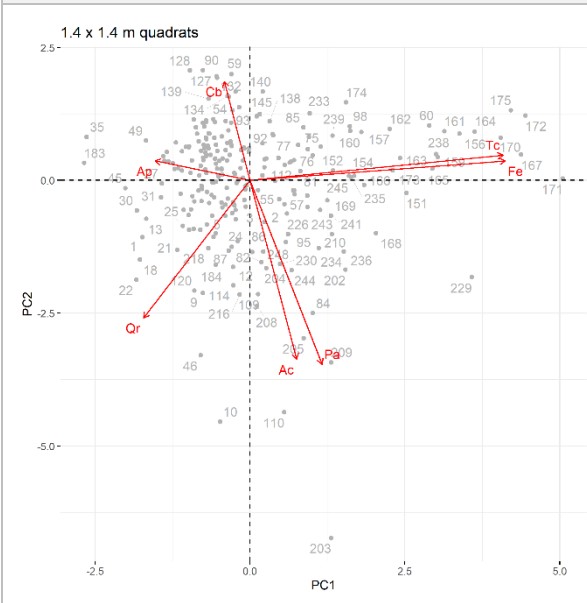

**Figure S4.** PCA biplot – 1.4 × 1.4 m quadrats

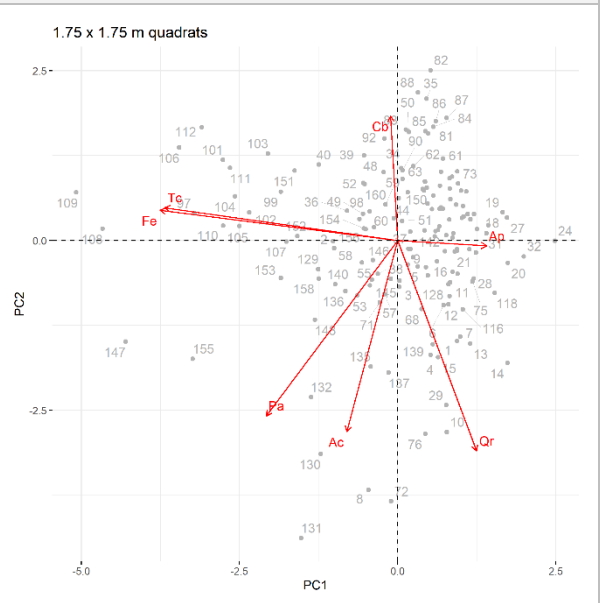

**Figure S5.** PCA biplot – 1.75 × 1.75 m quadrats

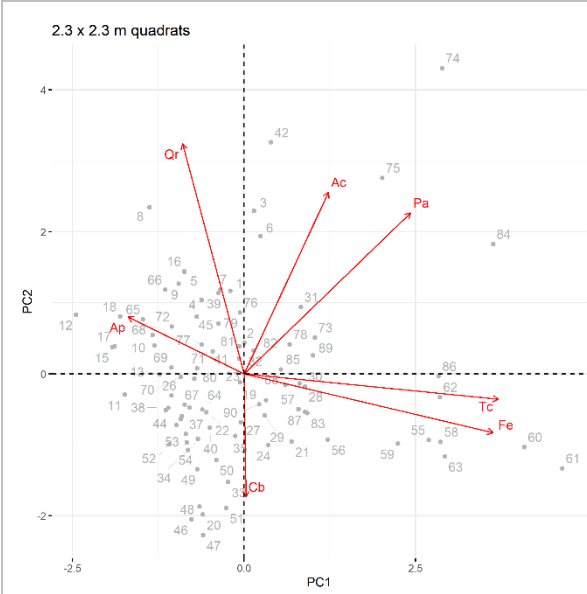

**Figure S6.** PCA biplot – 2.33 × 2.33 m quadrats

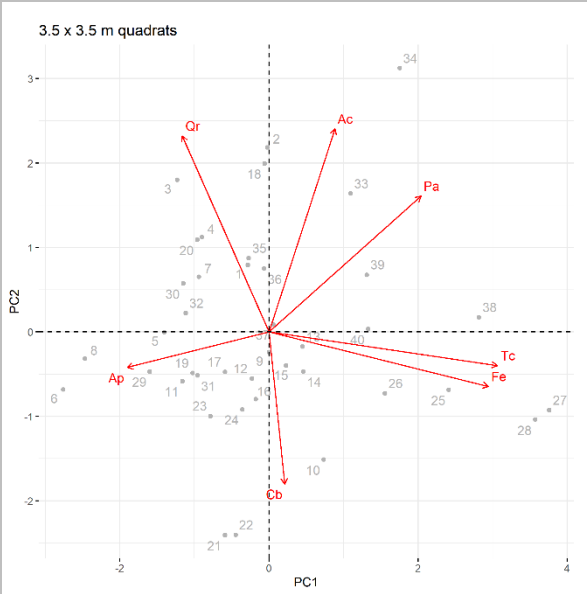

**Figure S7.** PCA biplot – 3.5 × 3.5 m quadrats

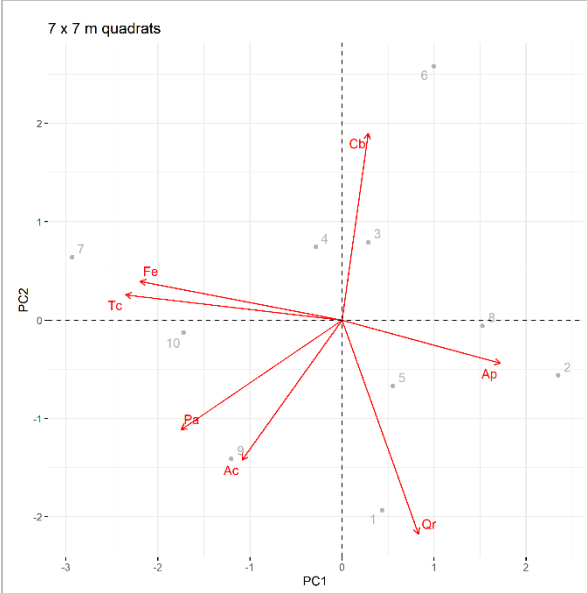

**Figure S8.** PCA biplot – 7 × 7 m quadrats

Synthesis of the bivariate analysis – Summary graphs for the significant species association ranges

*Observation:* The significant positive association ranges are marked with dark grey bars, while the negative ones are marked with light grey bars. Distances are given in centimetres. The circled plot numbers mark the plots with a significance level of probability lower than 0.05, considering the Cramer-von Mises test.

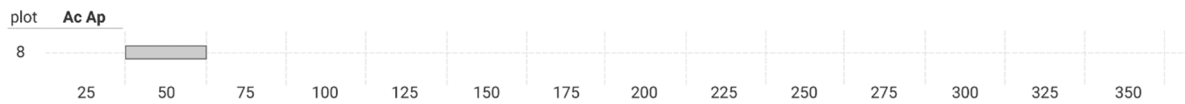

Figure S9. Ac–Ap significant association ranges

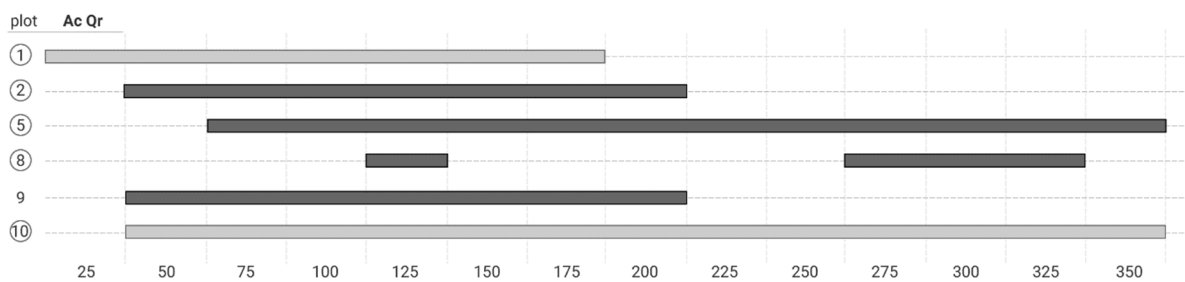

Figure S10. Ac–Qr significant association ranges

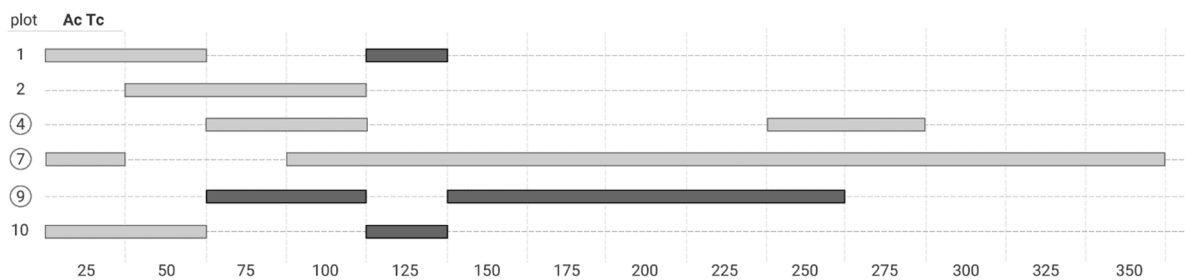

Figure S11. Ac–Tc significant association ranges

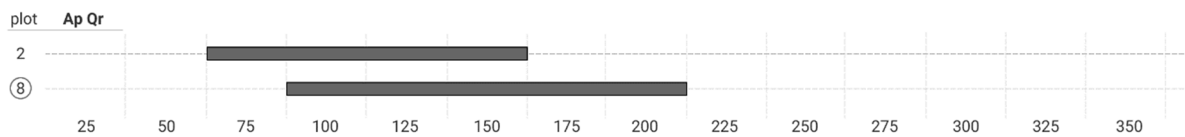

Figure S12. Ap–Qr significant association ranges

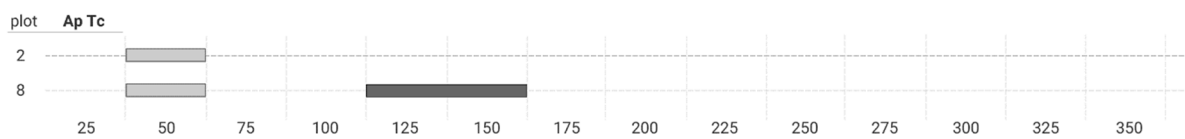

Figure S13. Ap–Tc significant association ranges

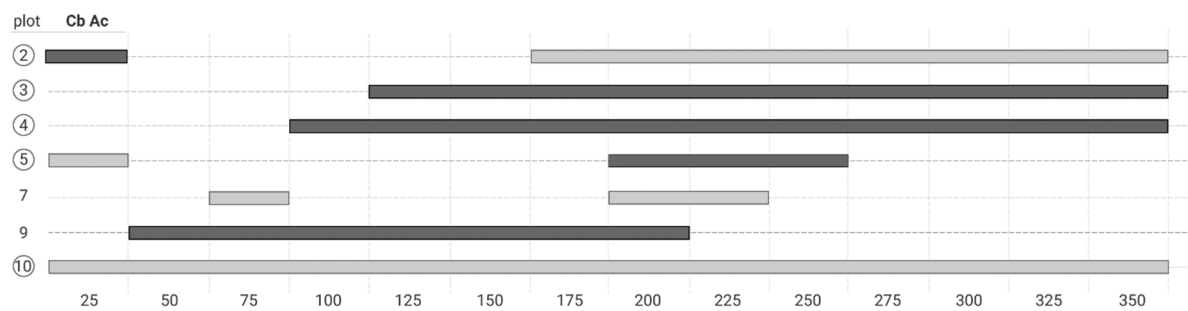

**Figure S14.** Cb–Ac significant association ranges

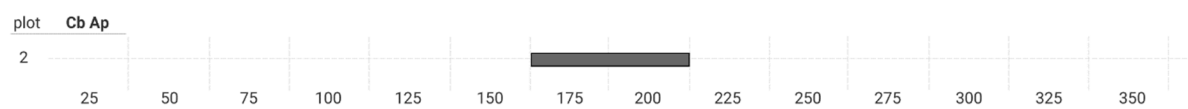

**Figure S15.** Cb–Ap significant association ranges

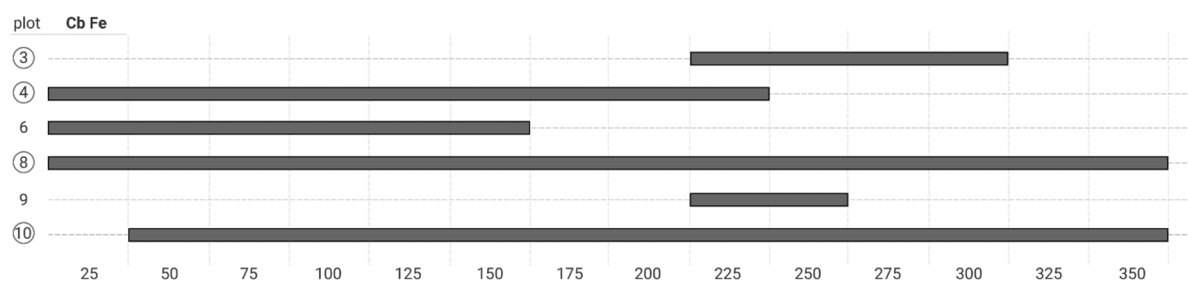

**Figure S16.** Cb–Fe significant association ranges

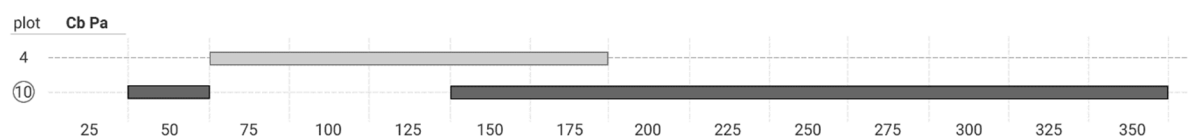

**Figure S17.** Cb–Pa significant association ranges

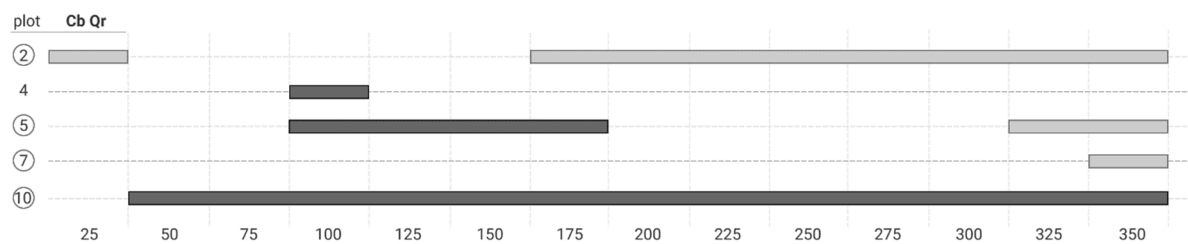

**Figure S18** Cb–Qr significant association ranges

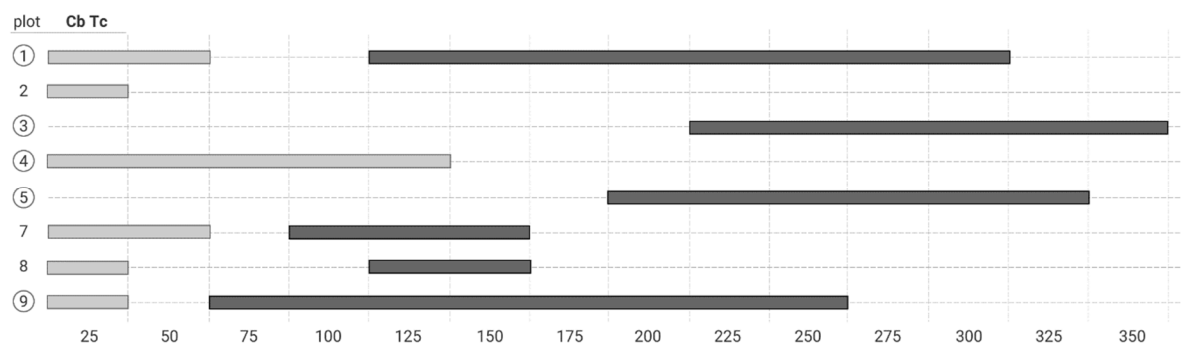

**Figure S19.** Cb–Tc significant association ranges

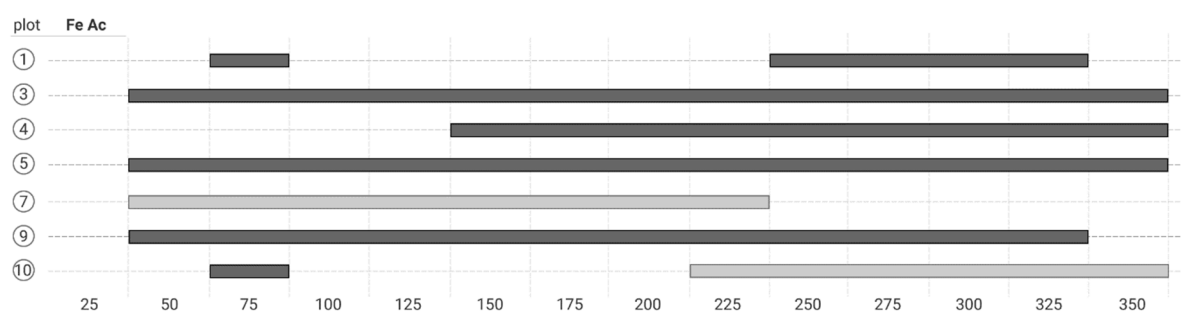

**Figure S20.** Fe–Ac significant association ranges

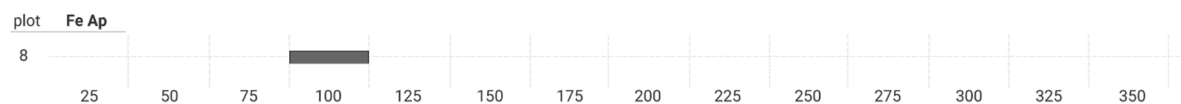

**Figure S21.** Fe–Ap significant association range

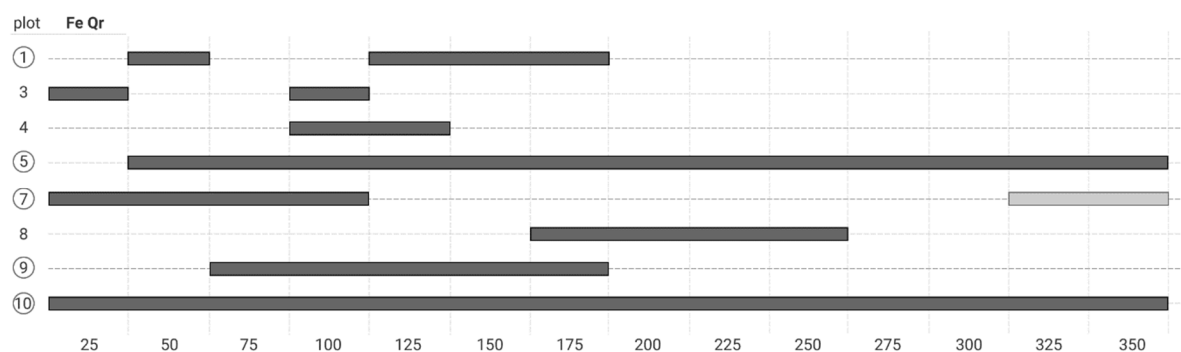

**Figure S22.** Fe–Qr significant association range



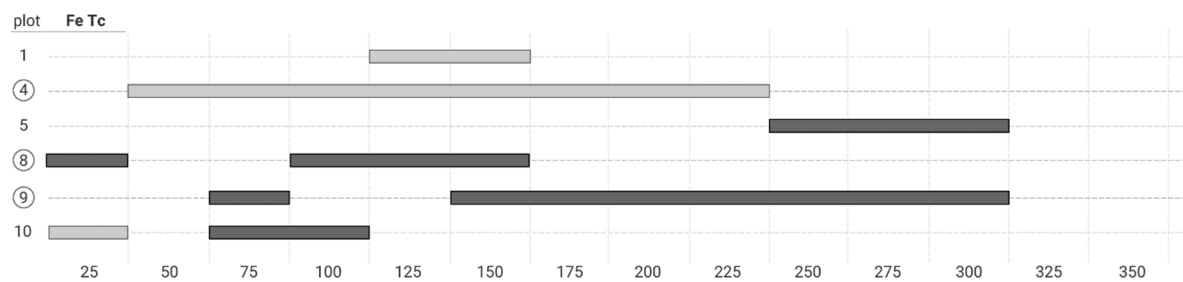

**Figure S23.** Fe-Tc significant association range

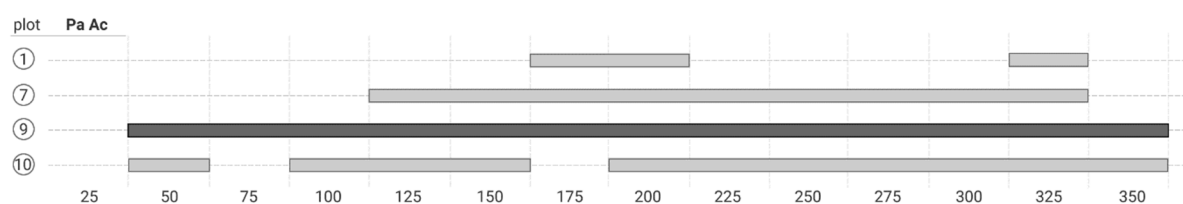

**Figure S24.** Pa-Ac significant association range

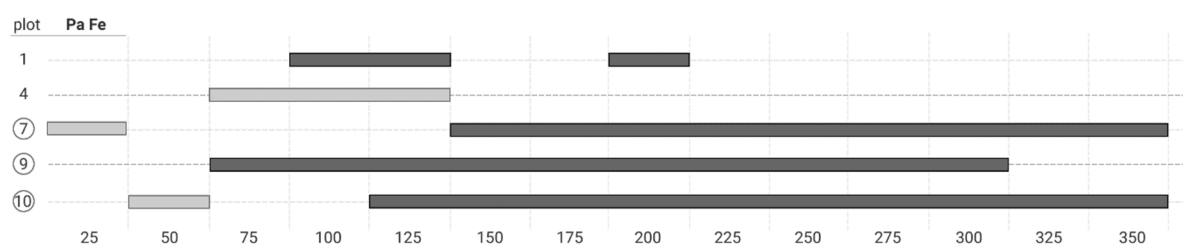

**Figure S25.** Pa-Fe significant association range

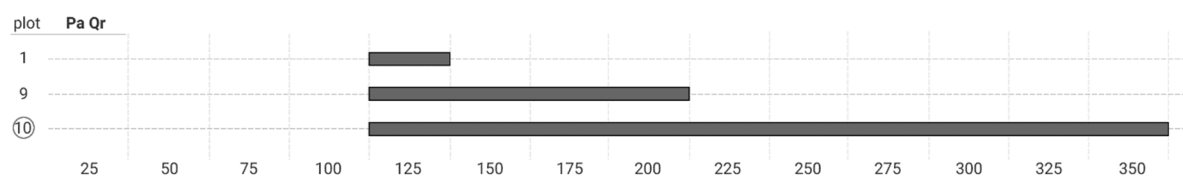

**Figure S26.** Pa-Qr significant association range

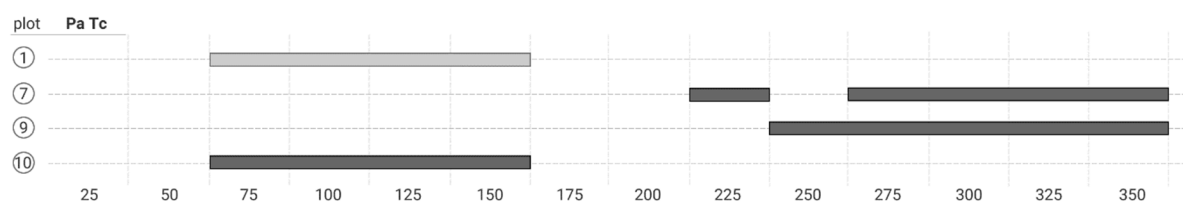

**Figure S27.** Pa-Tc significant association range

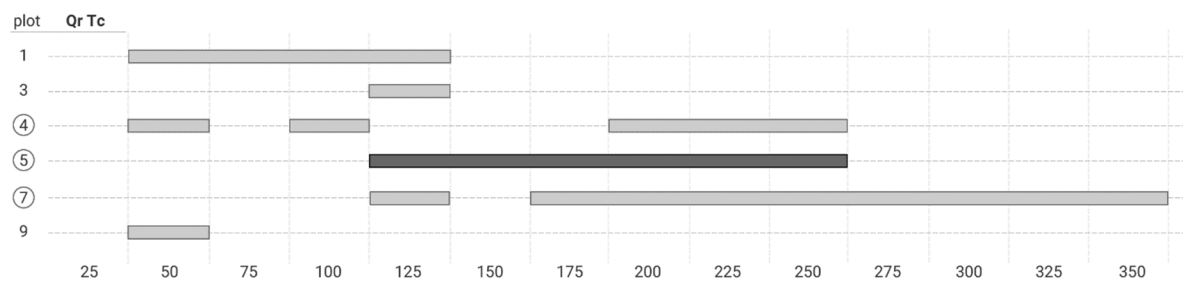

**Figure S28.** Qr-Tc significant association range

## The bivariate $L(t)$ function charts for between-species associations in the analysed plots

*Observation:* The positive values of  $L(t)$  indicate attraction, and the negative ones indicate repulsion among the spatial pattern of the analysed species. The critical confidence envelope at a significance level of 0.05 ( $p \leq 0.05$ ) for the  $L(t)$  function was generated using 1000 Monte Carlo simulations. An overall Cramer-von Mises test was applied, assessing the significance level of probability  $p$  (higher or lower than 0.05). Distances are given in centimetres.

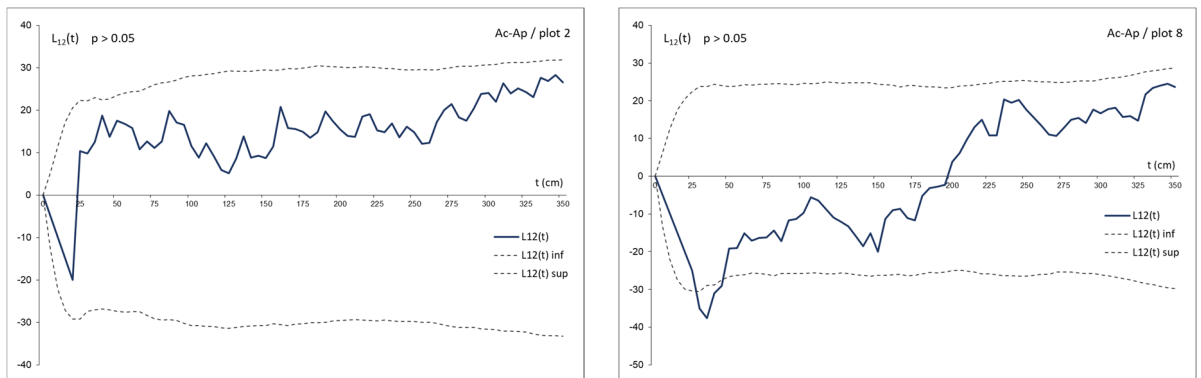

**Figure S29.** The bivariate  $L(t)$  function charts for Ac-Ap pair

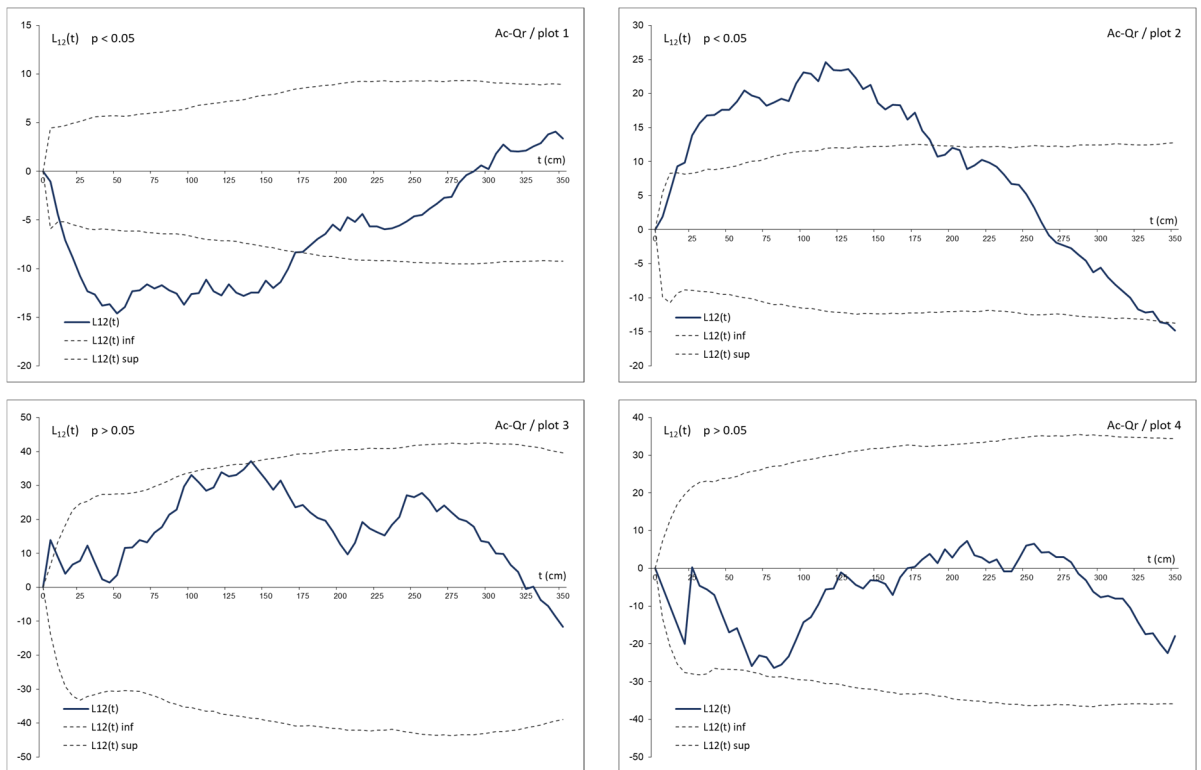

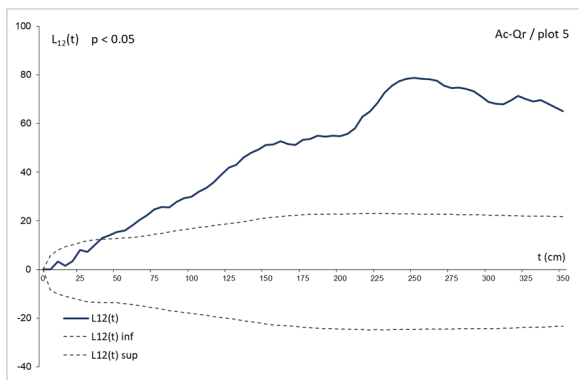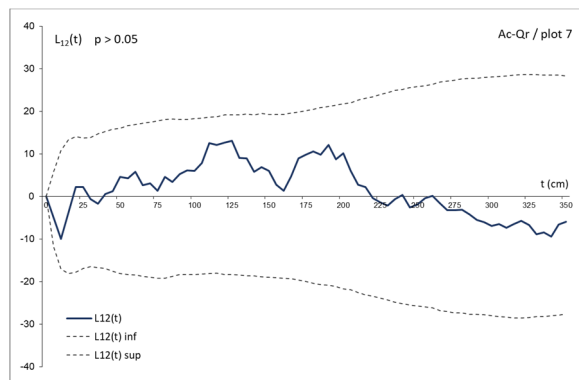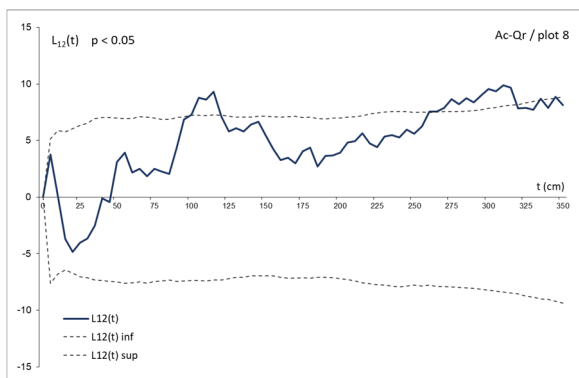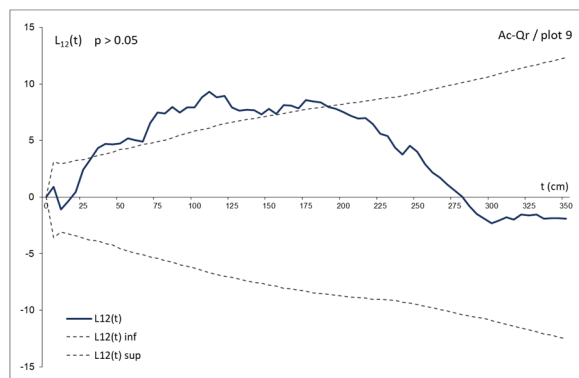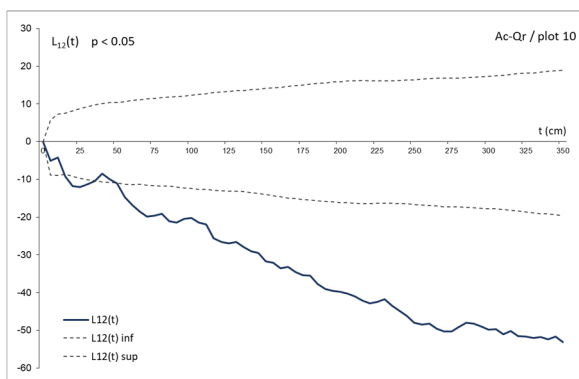

**Figure S30.** The bivariate  $L(t)$  function charts for Ac-Qr pair

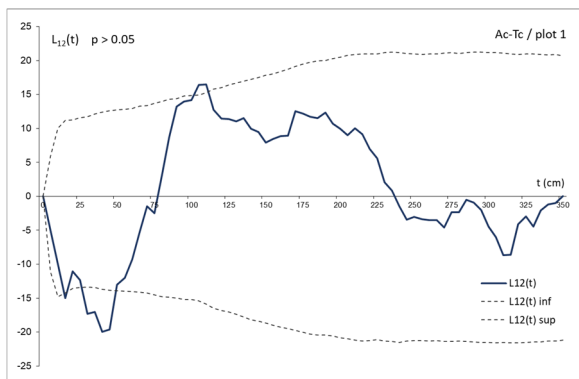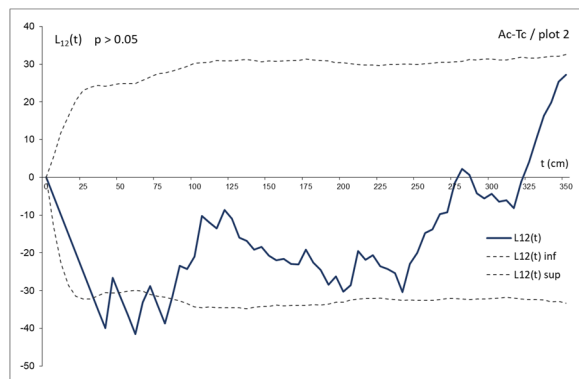

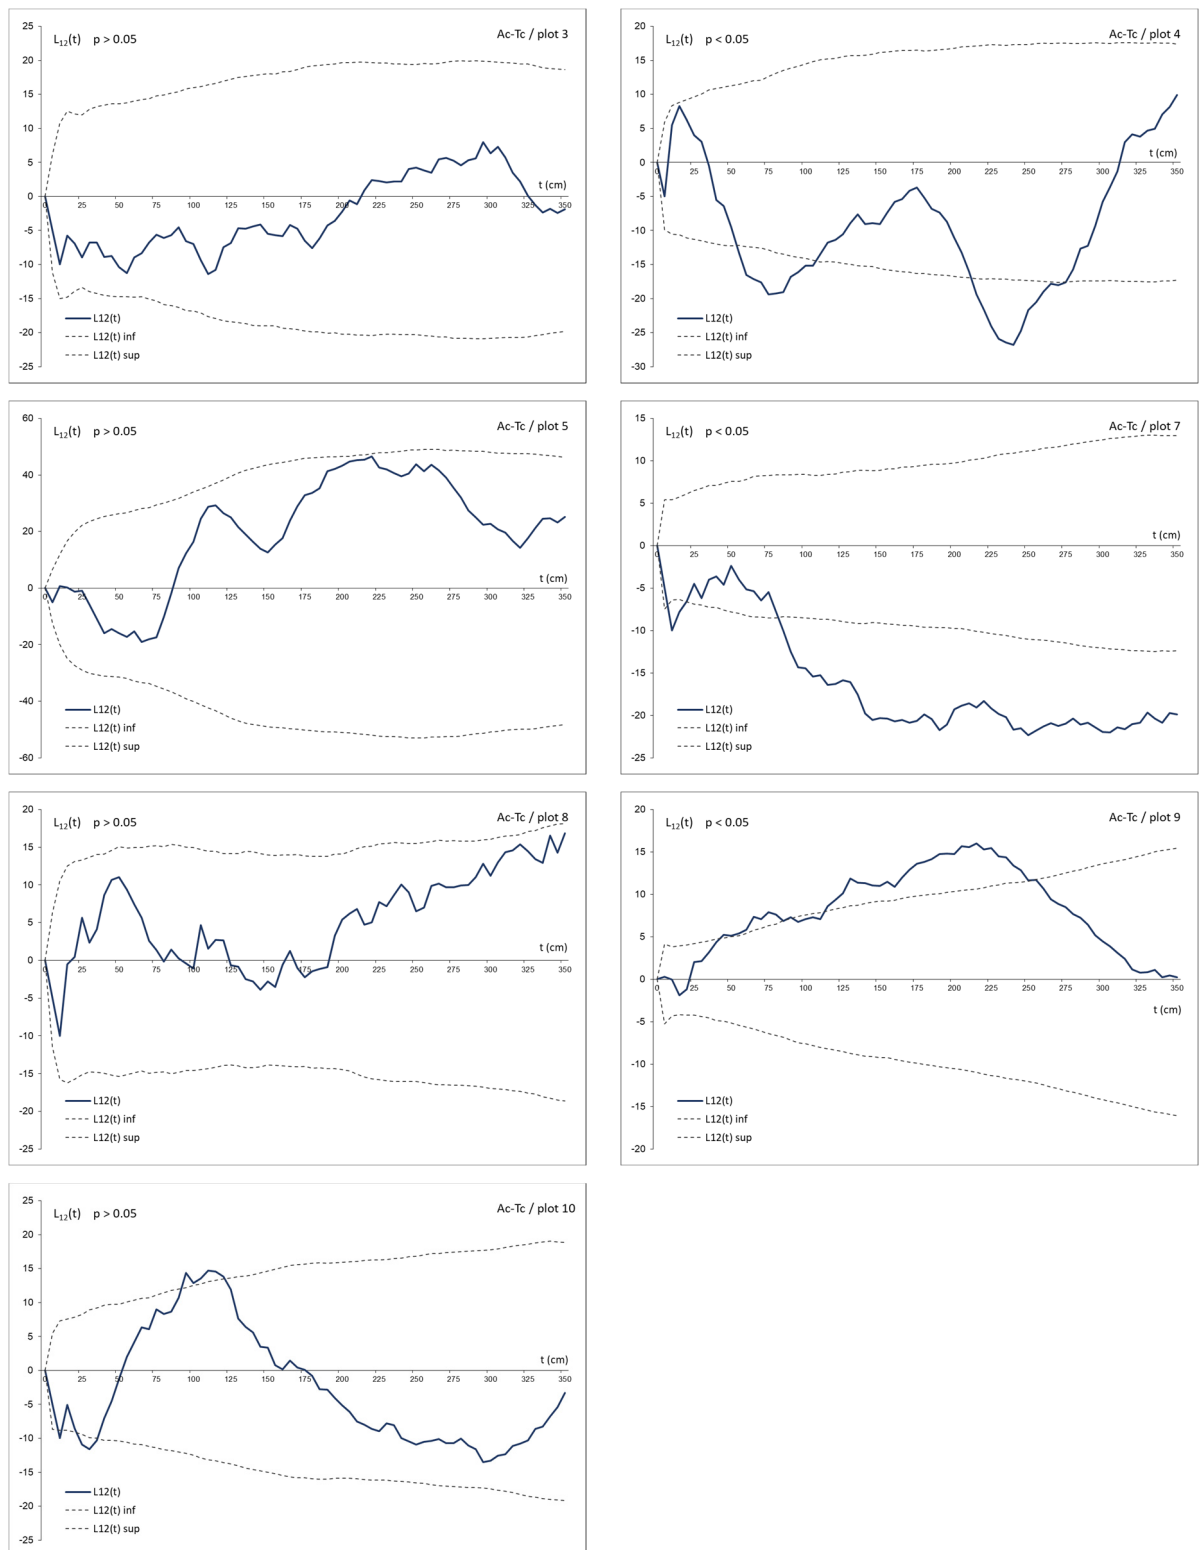

**Figure S31.** The bivariate  $L(t)$  function charts for Ac-Tc pair

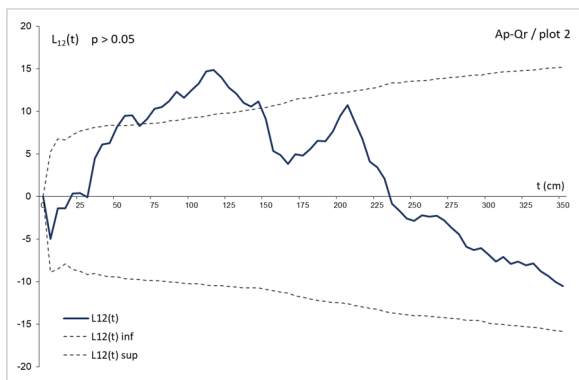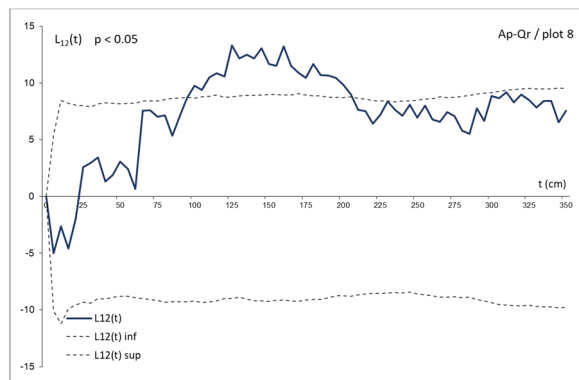

**Figure S32.** The bivariate  $L(t)$  function charts for Ap-Qr pair

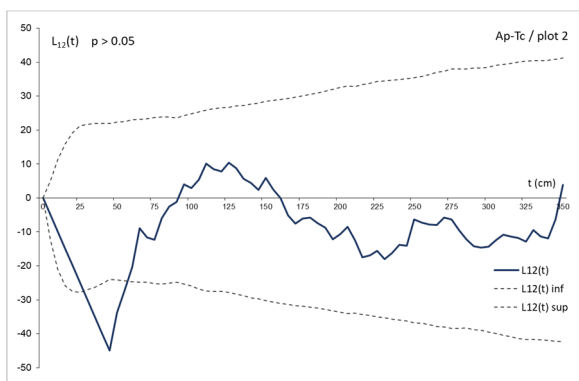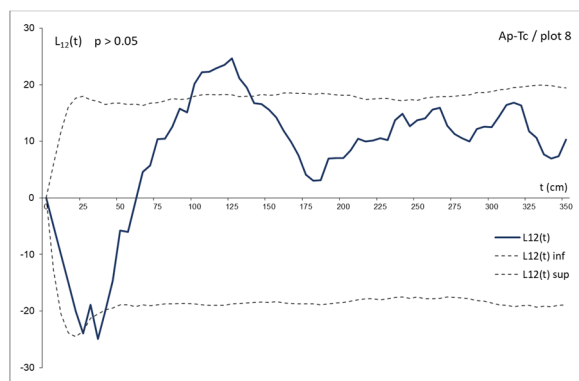

**Figure S33.** The bivariate  $L(t)$  function charts for Ap-Tc pair

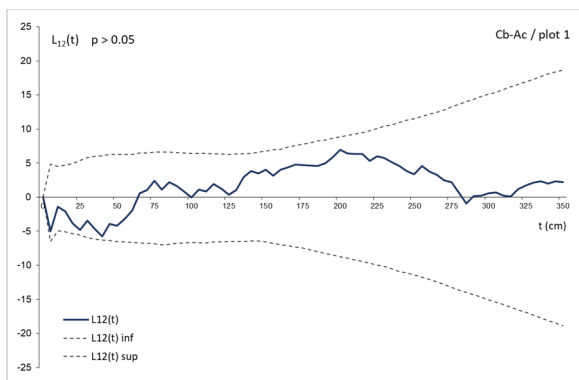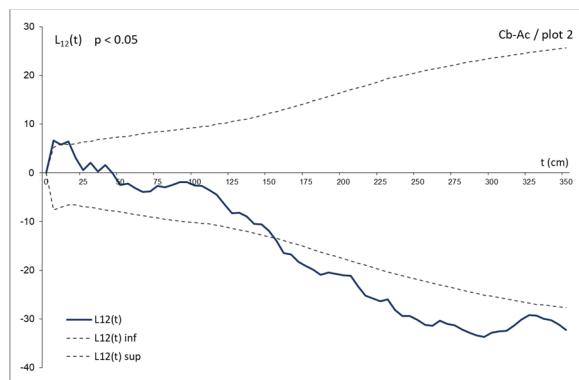

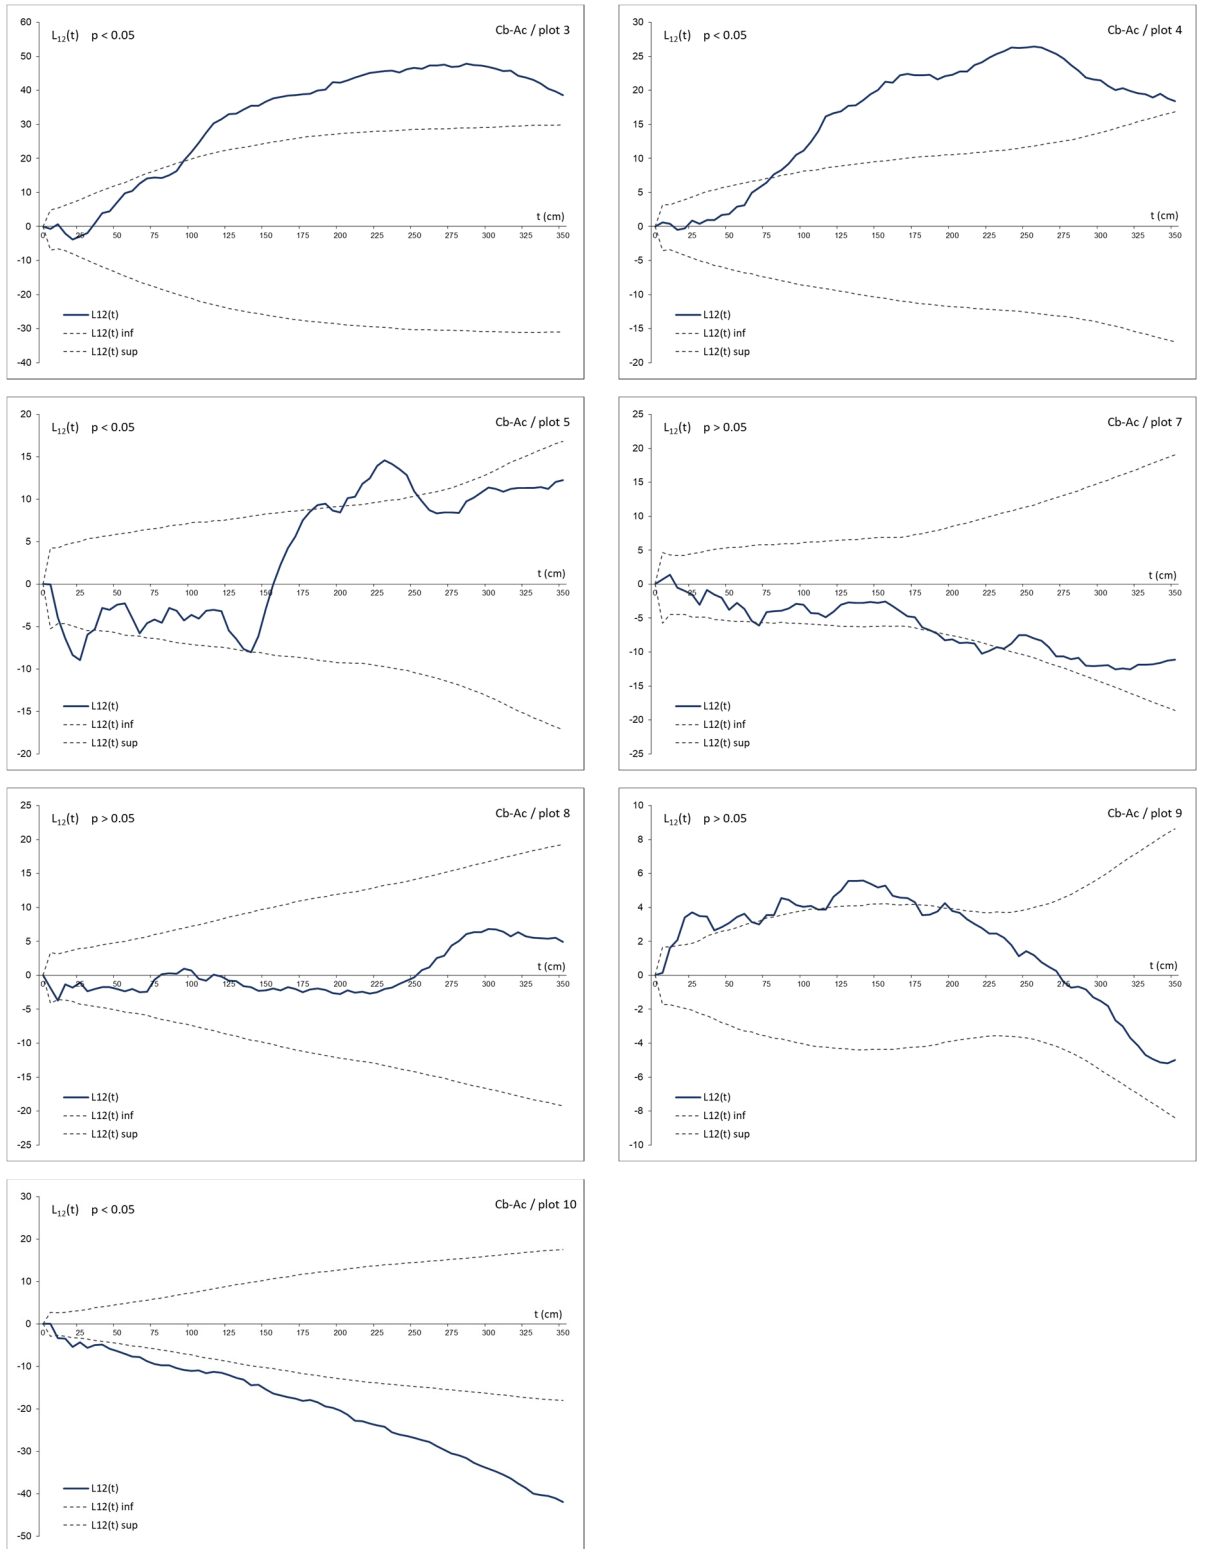

**Figure S34.** The bivariate  $L(t)$  function charts for Cb-Ac pair

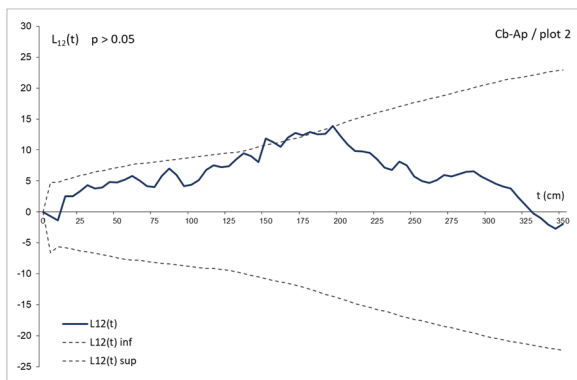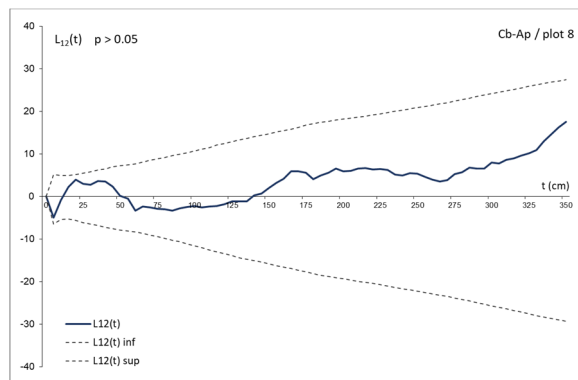

**Figure S35.** The bivariate  $L(t)$  function charts for Cb–Ap pair

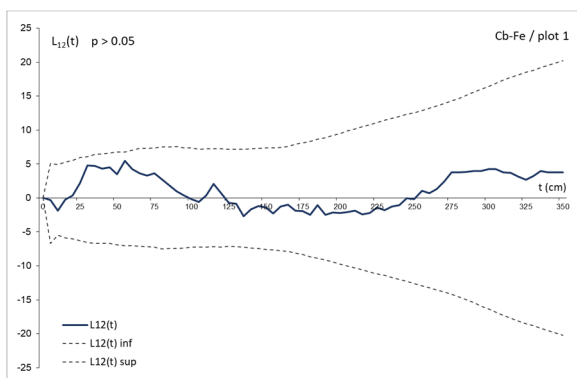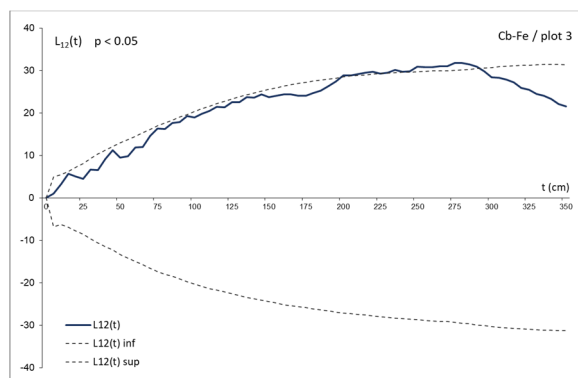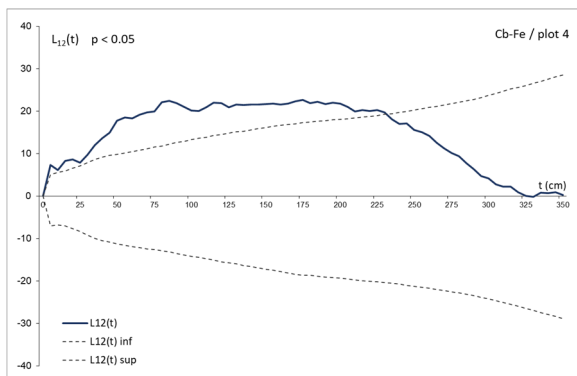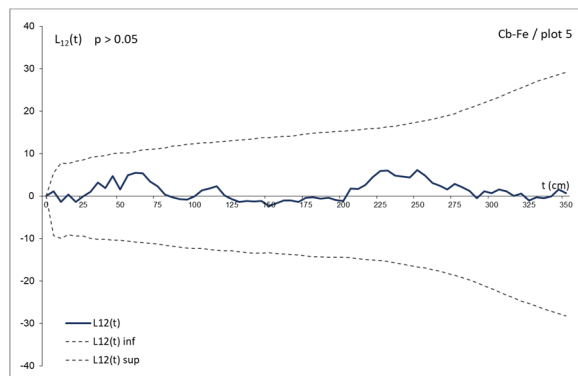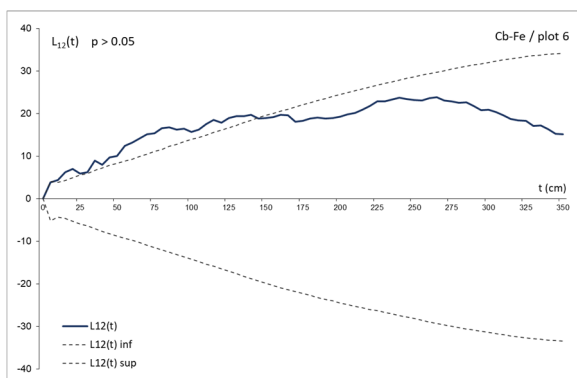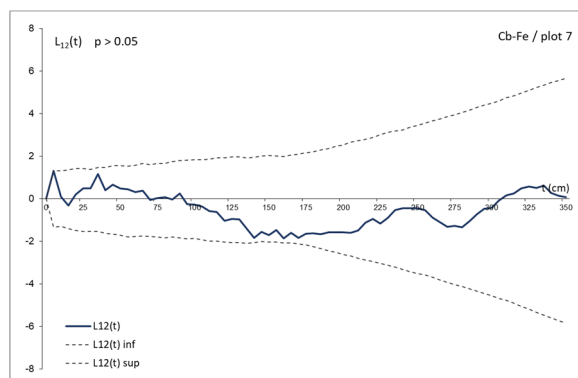



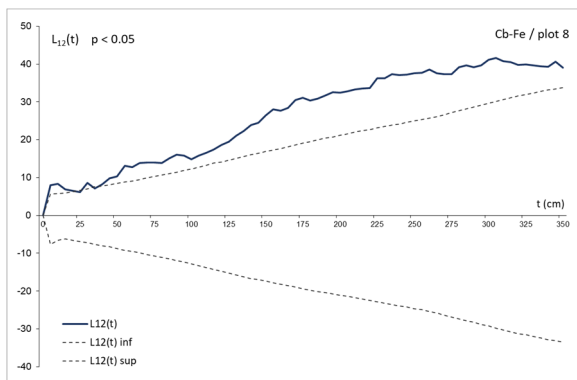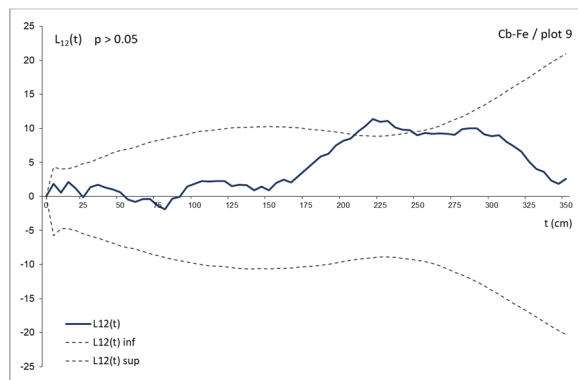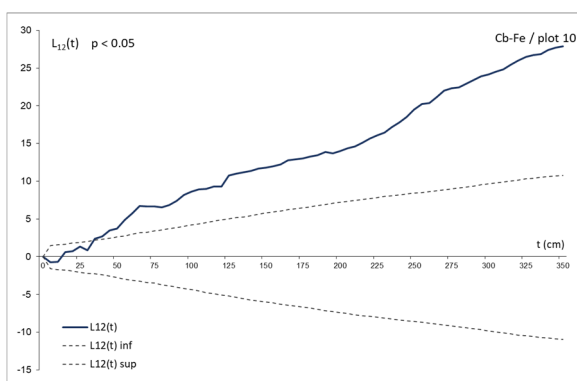

**Figure S36.** The bivariate  $L(t)$  function charts for Cb-Fe pair

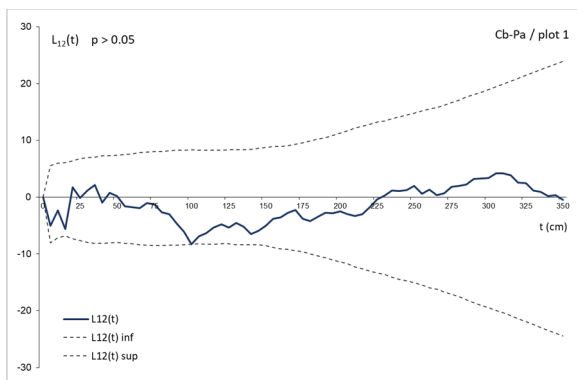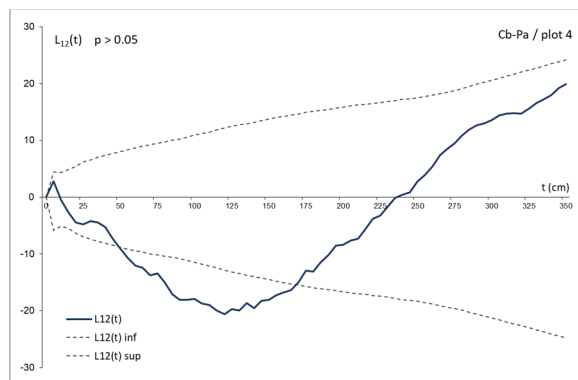

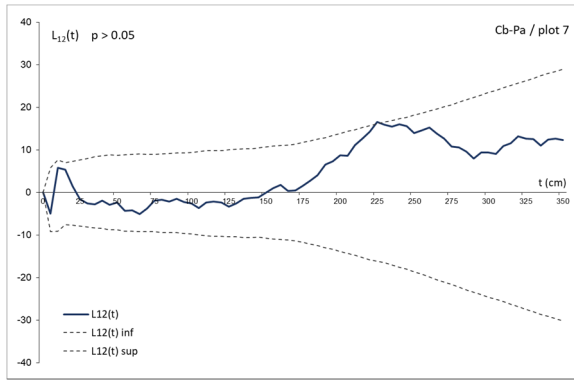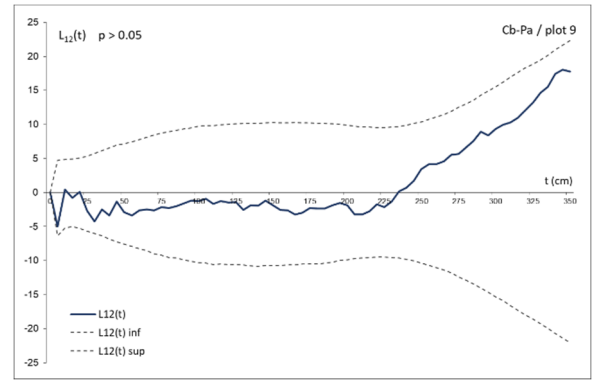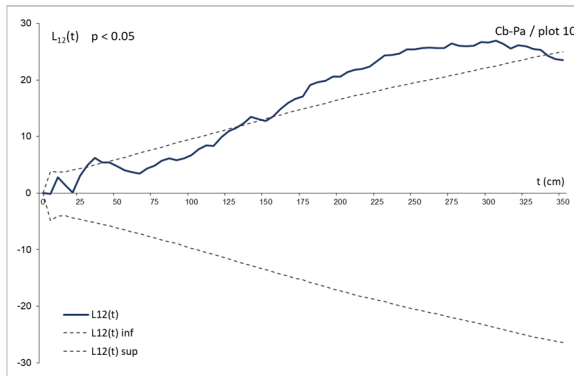

**Figure S37.** The bivariate  $L(t)$  function charts for Cb-Pa pair

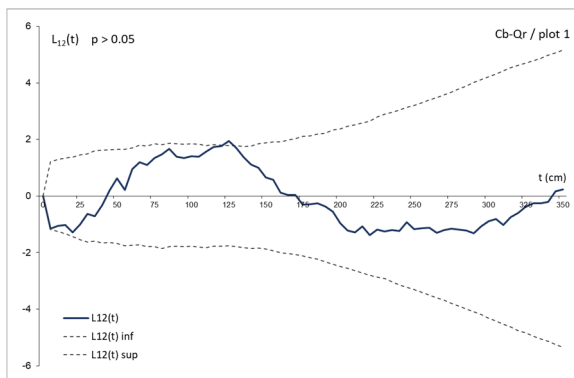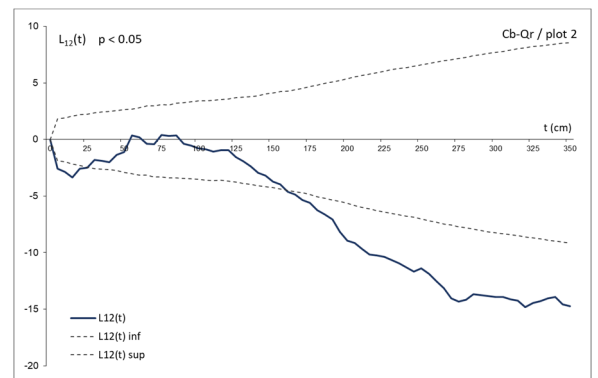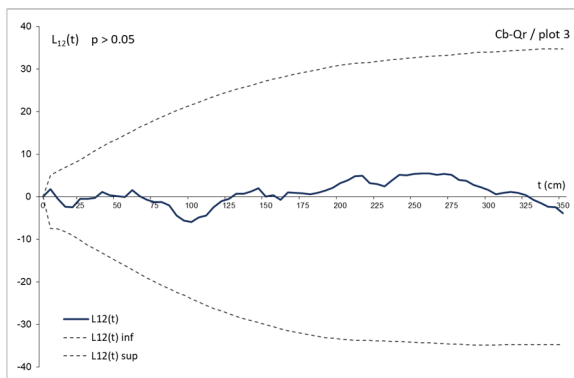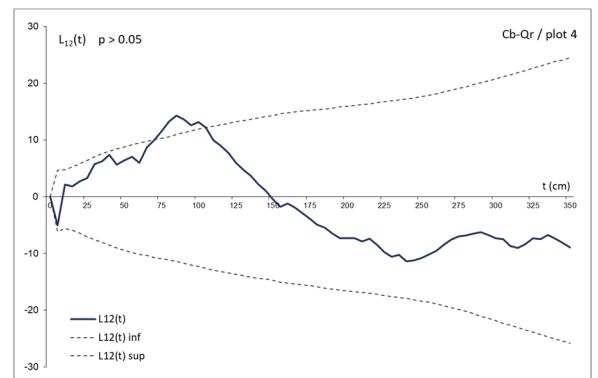

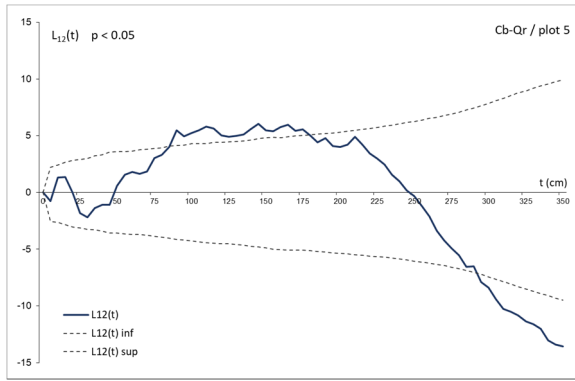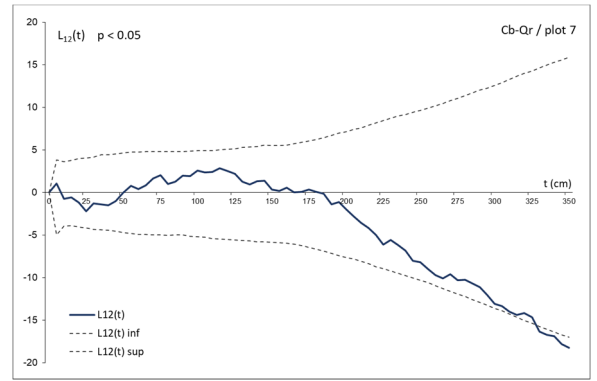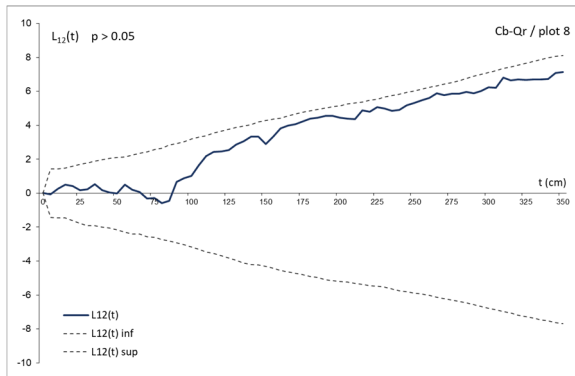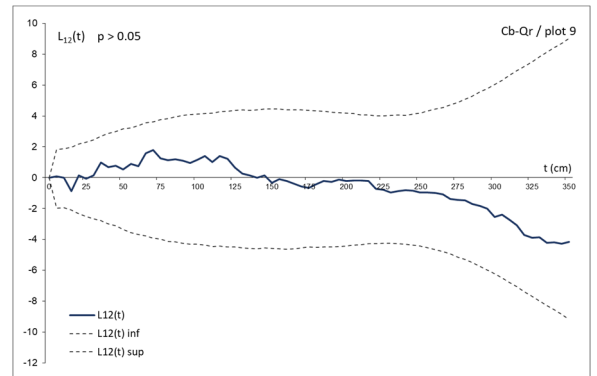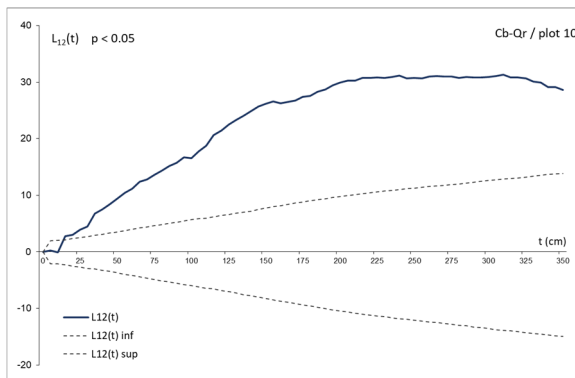

**Figure S38.** The bivariate  $L(t)$  function charts for Cb-Qr pair

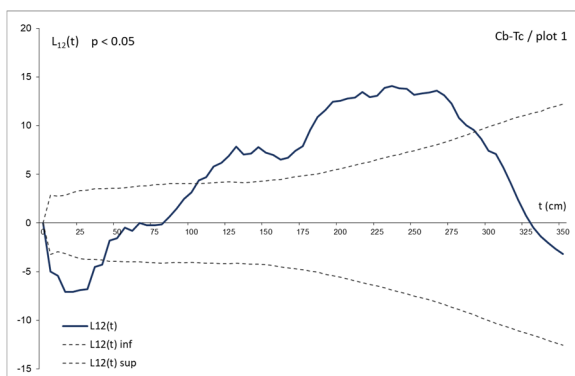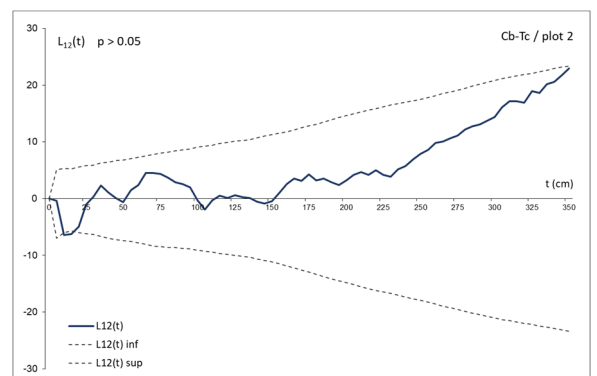

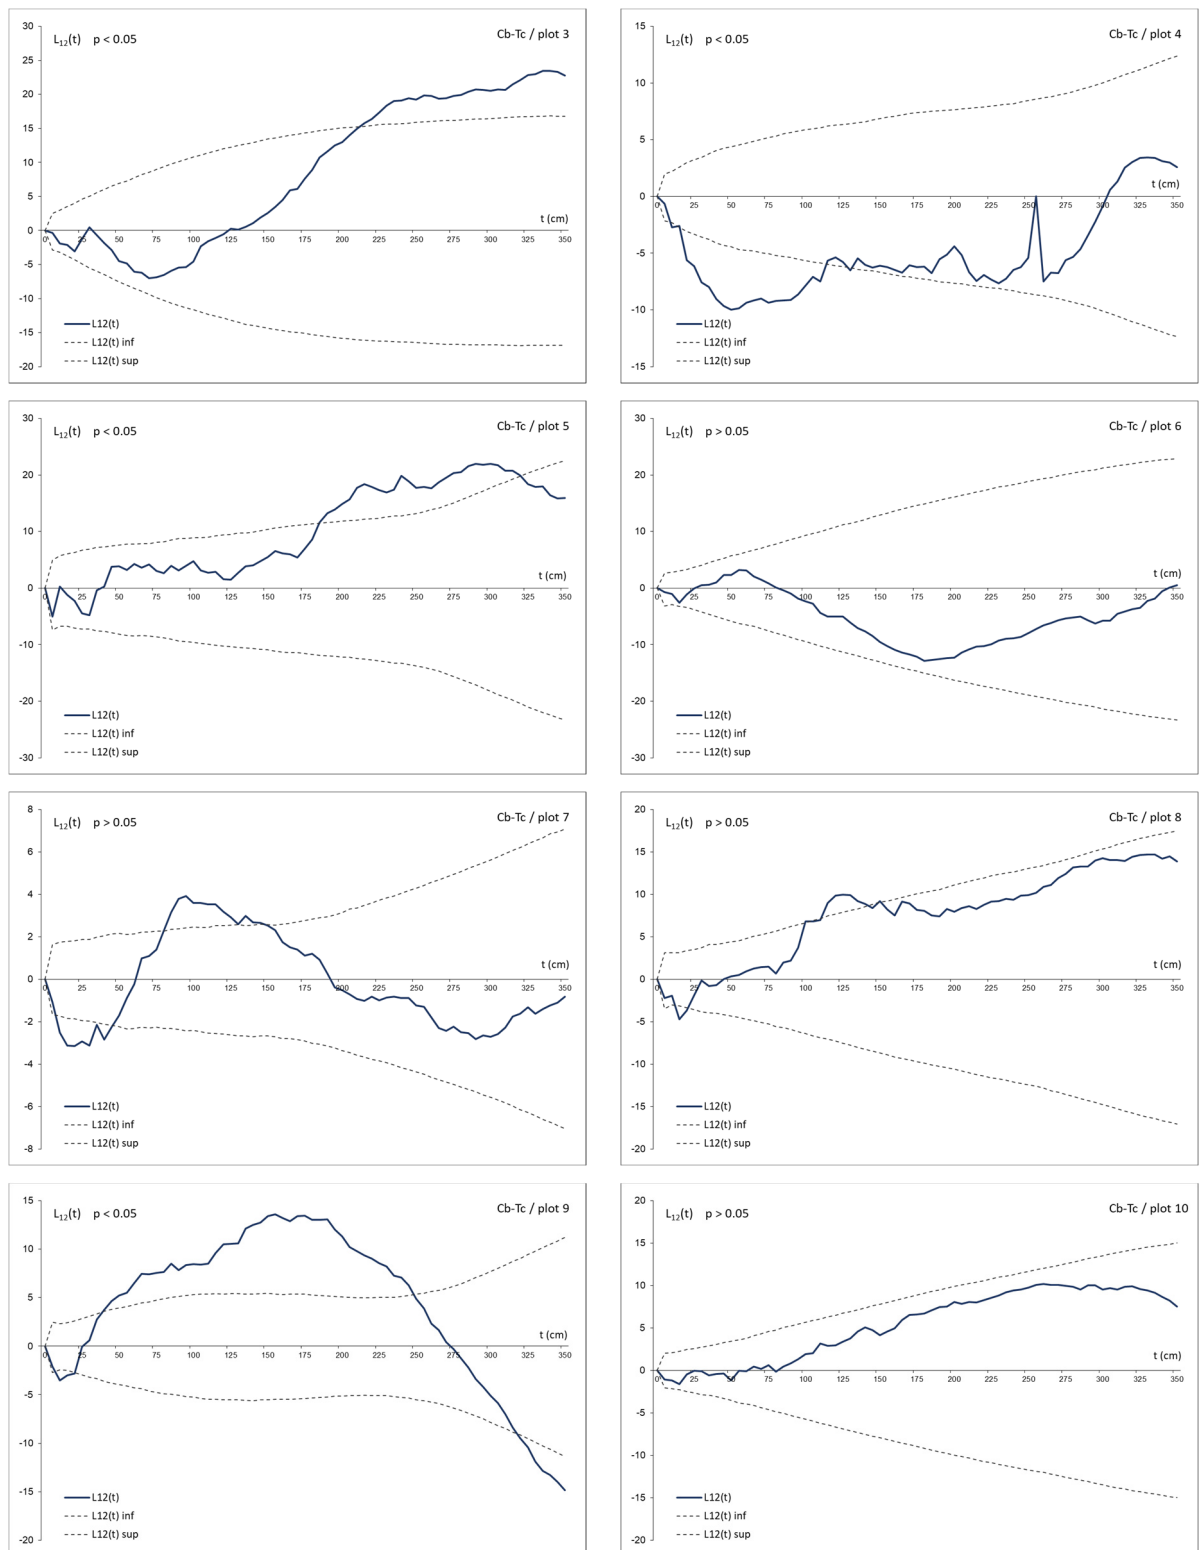

**Figure S39.** The bivariate  $L(t)$  function charts for Cb-Tc pair

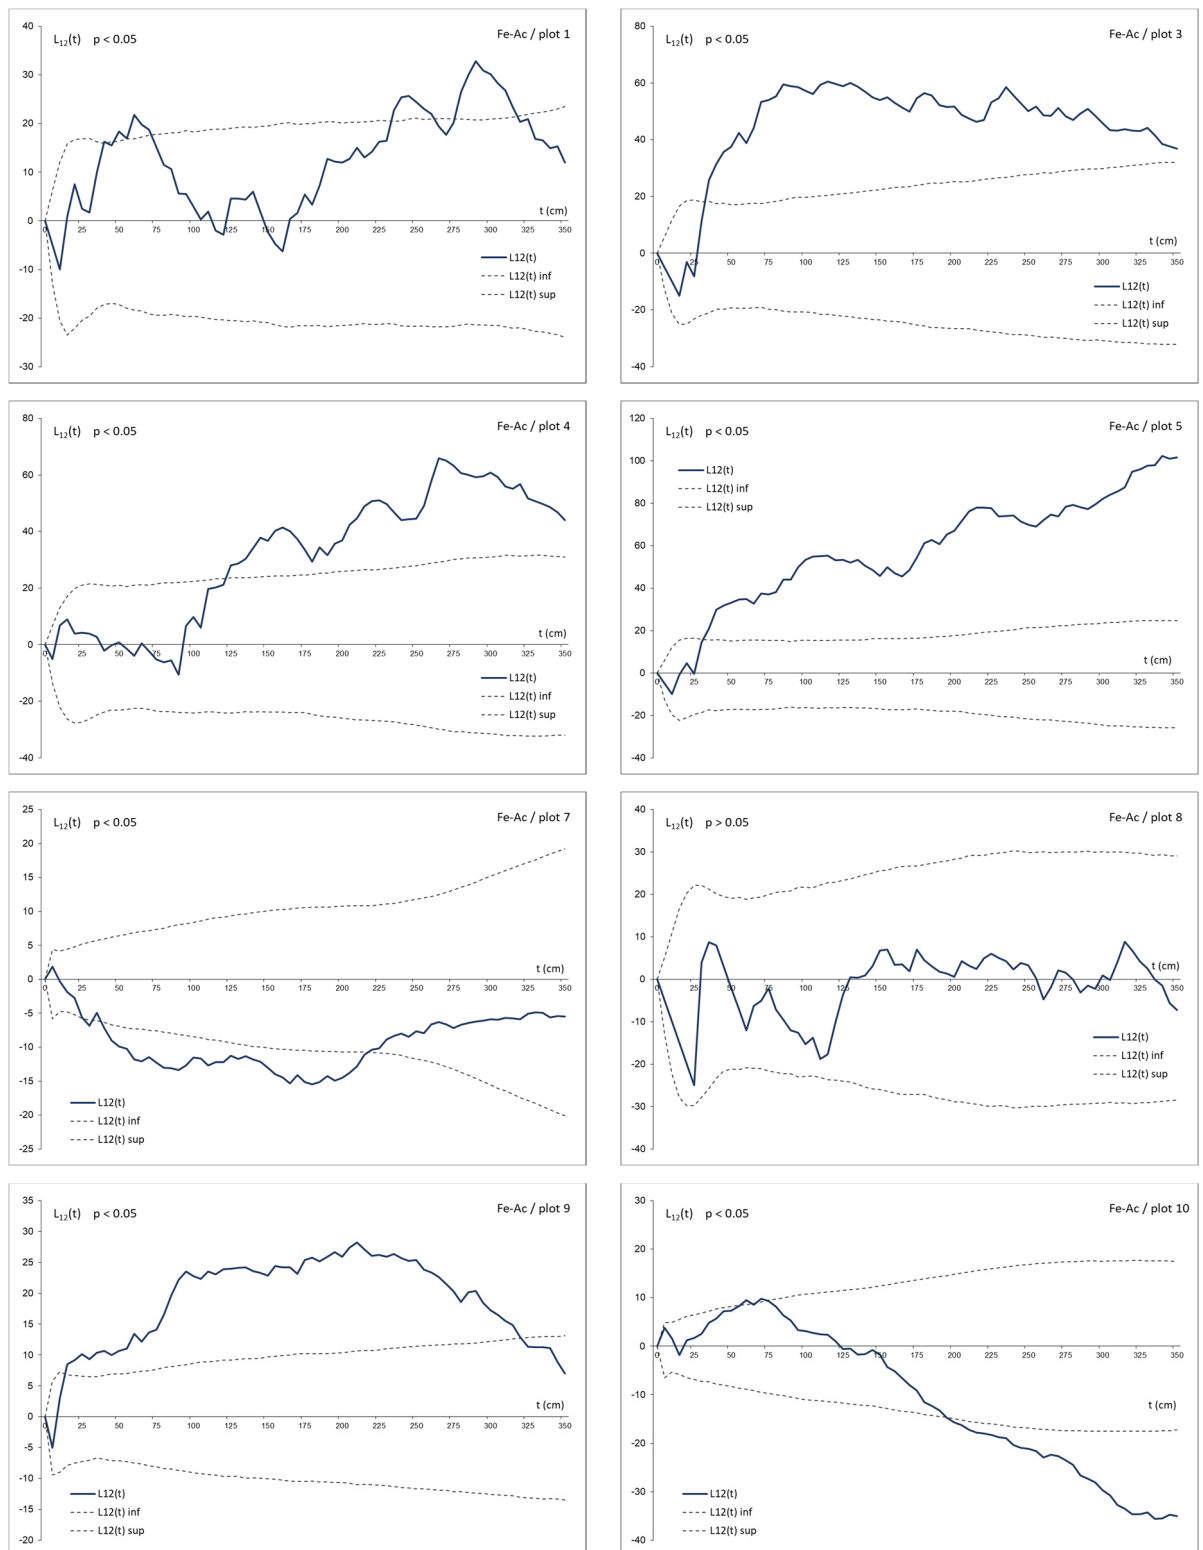

**Figure S40.** The bivariate  $L(t)$  function charts for Fe-Ac pair

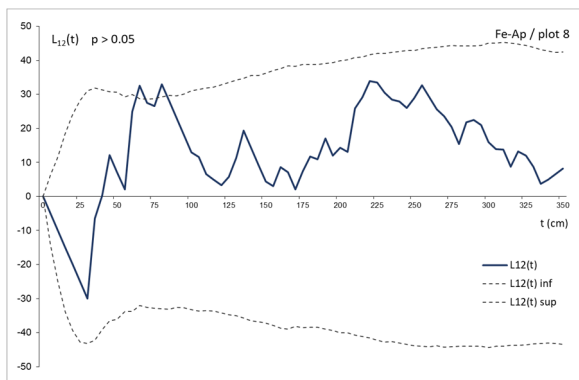

**Figure S41.** The bivariate  $L(t)$  function chart for Fe-Ap pair

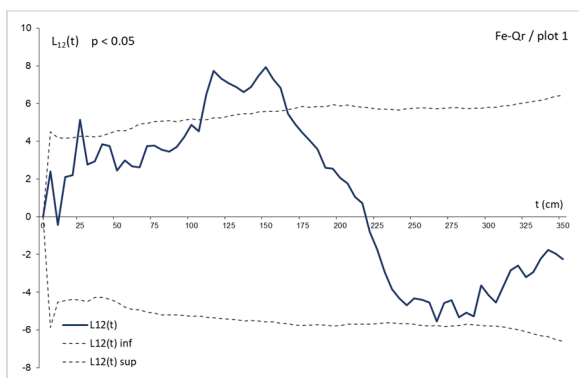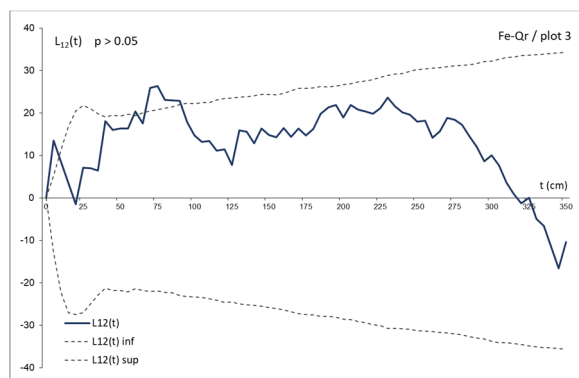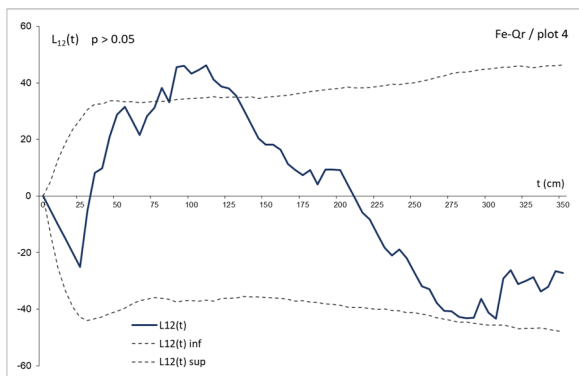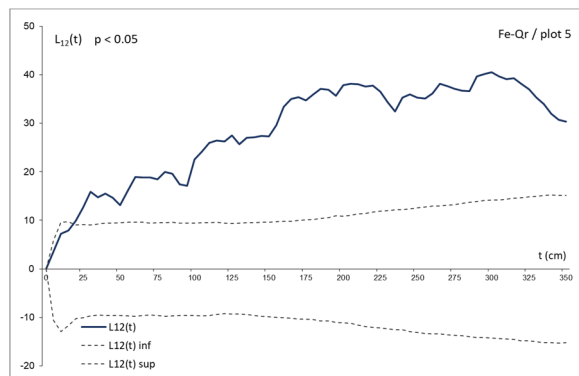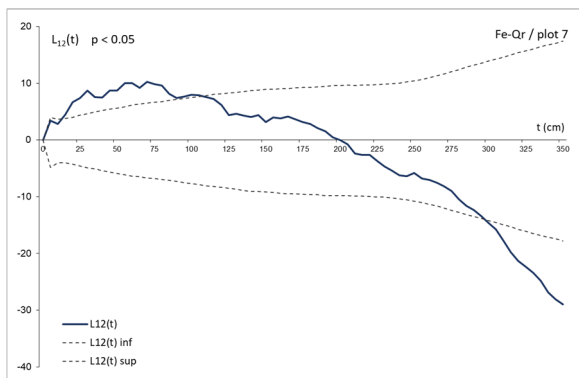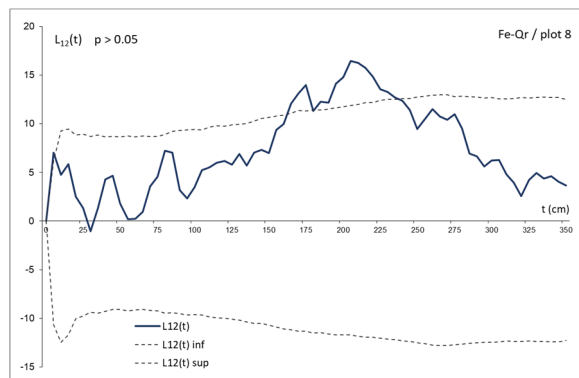

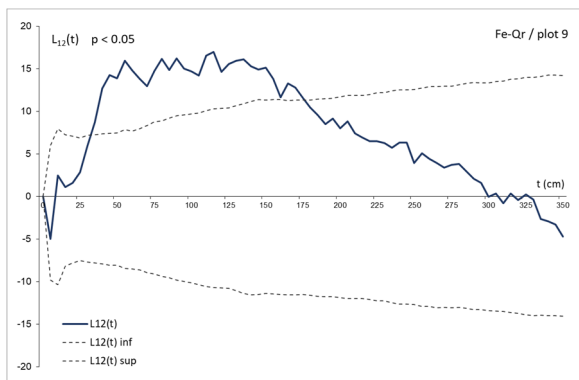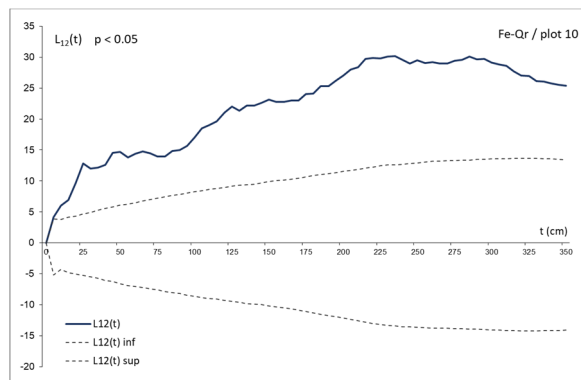

**Figure S42.** The bivariate  $L(t)$  function charts for Fe-Qr pair

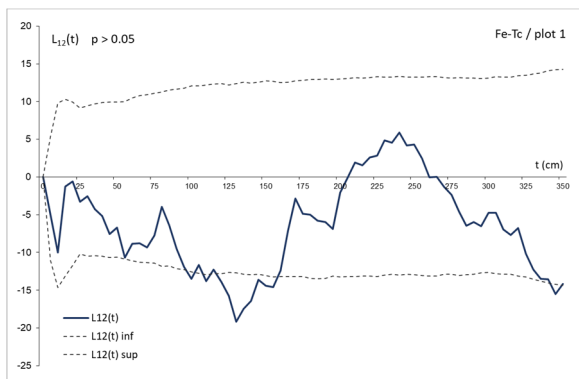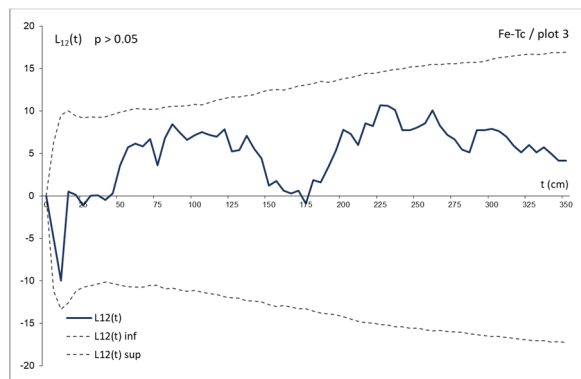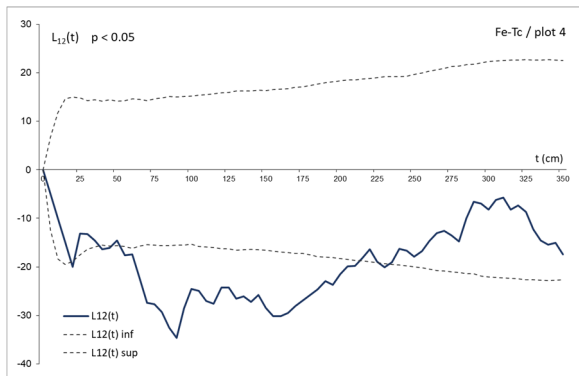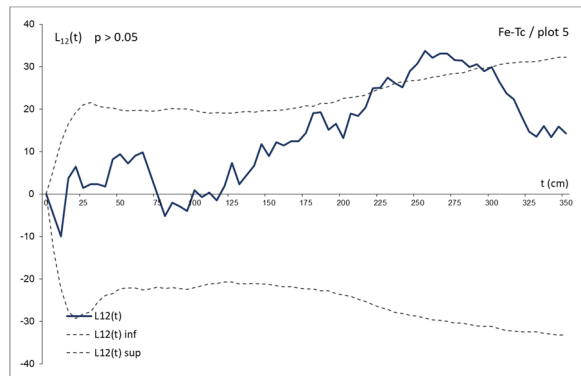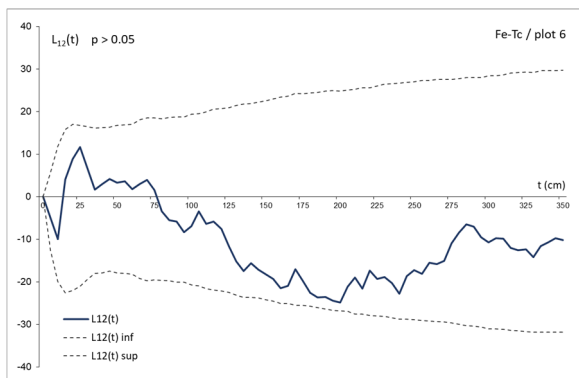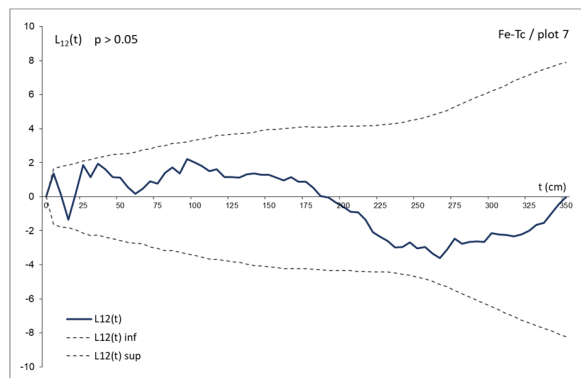

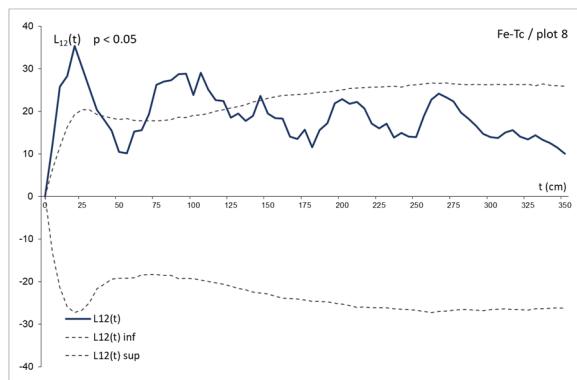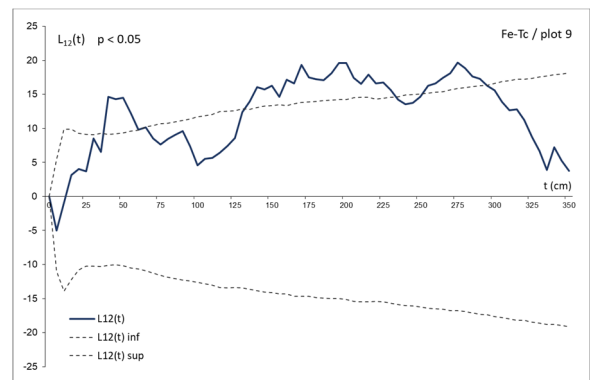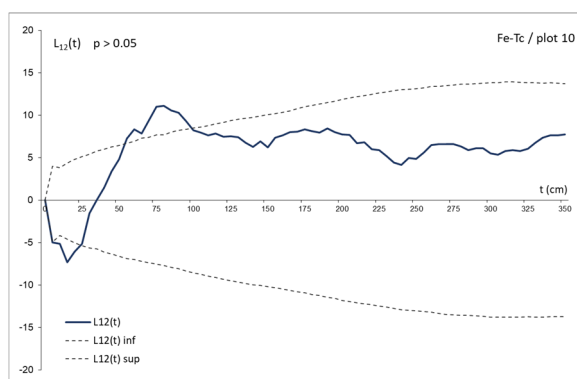

**Figure S43.** The bivariate  $L(t)$  function charts for Fe-Tc pair



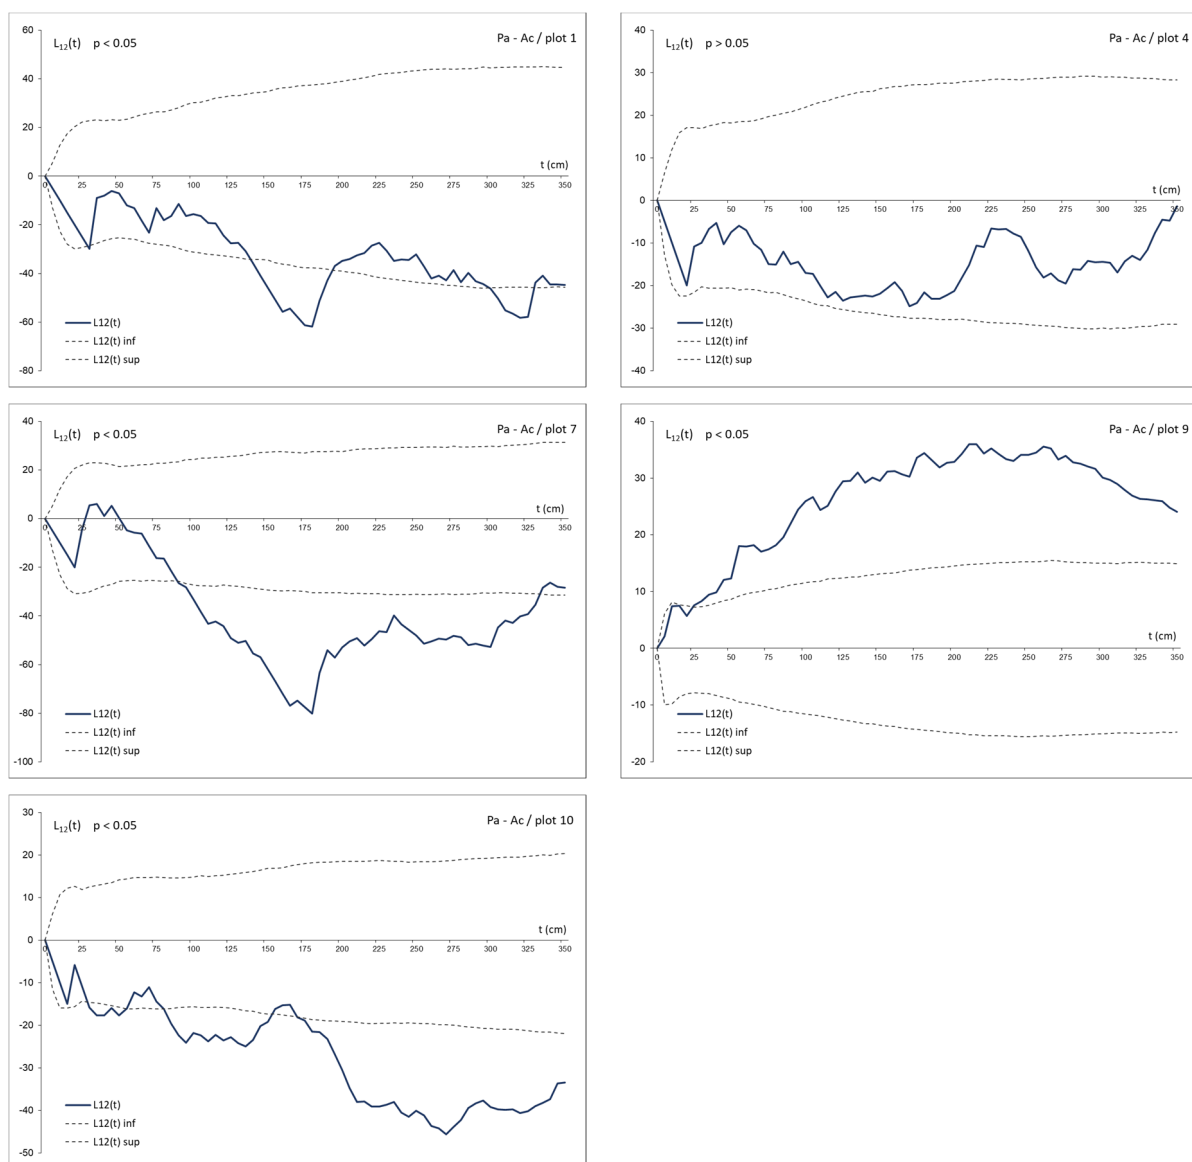

**Figure S44.** The bivariate  $L(t)$  function charts for Pa-Ac pair

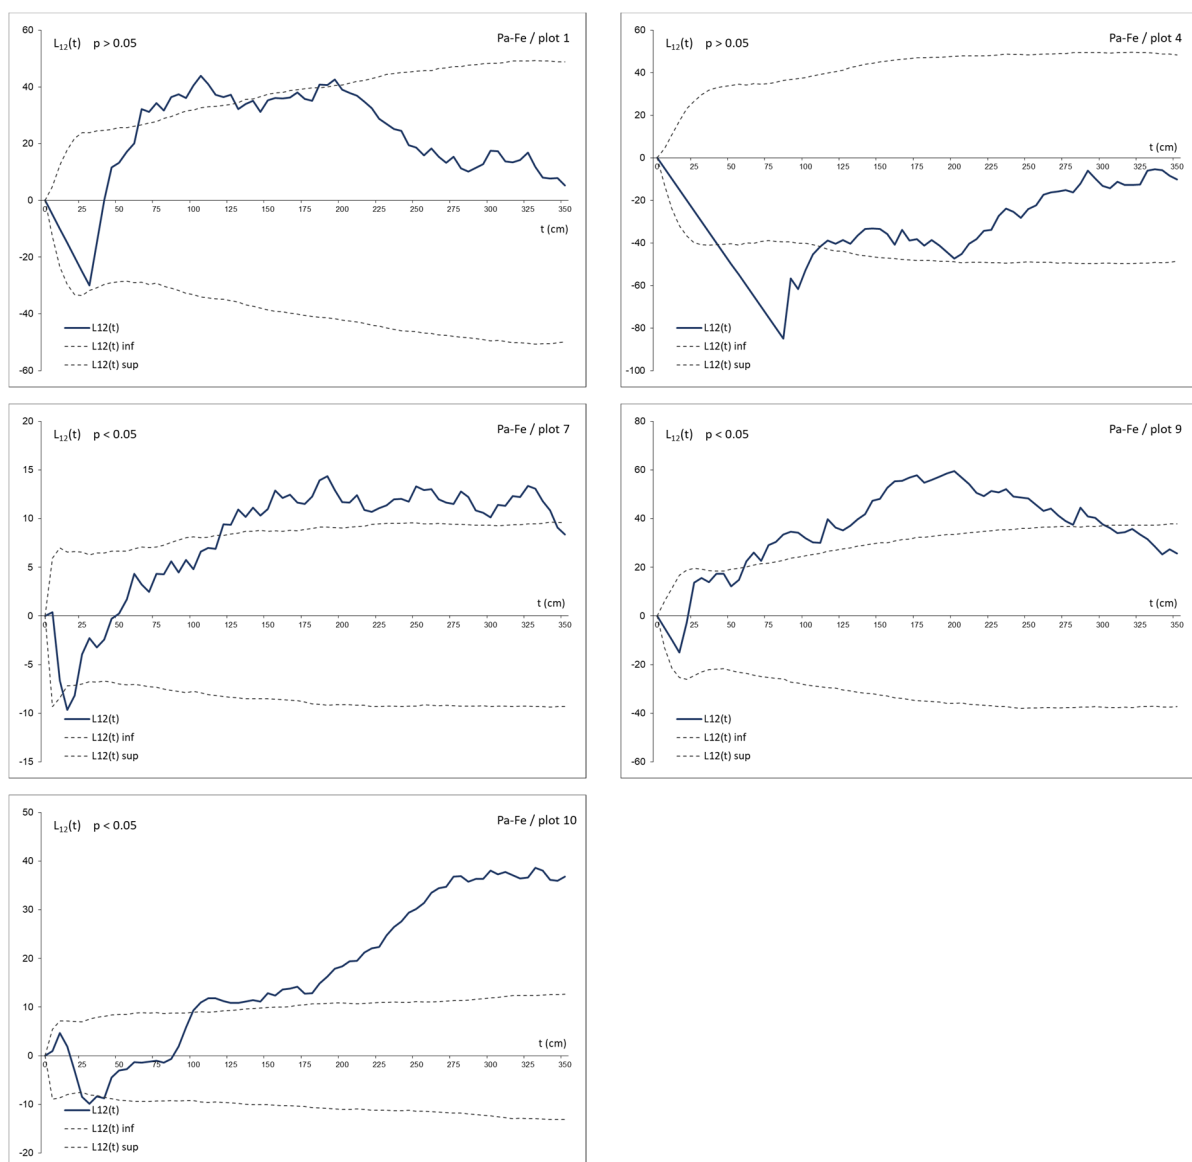

**Figure S45.** The bivariate  $L(t)$  function charts for Pa-Fe pair

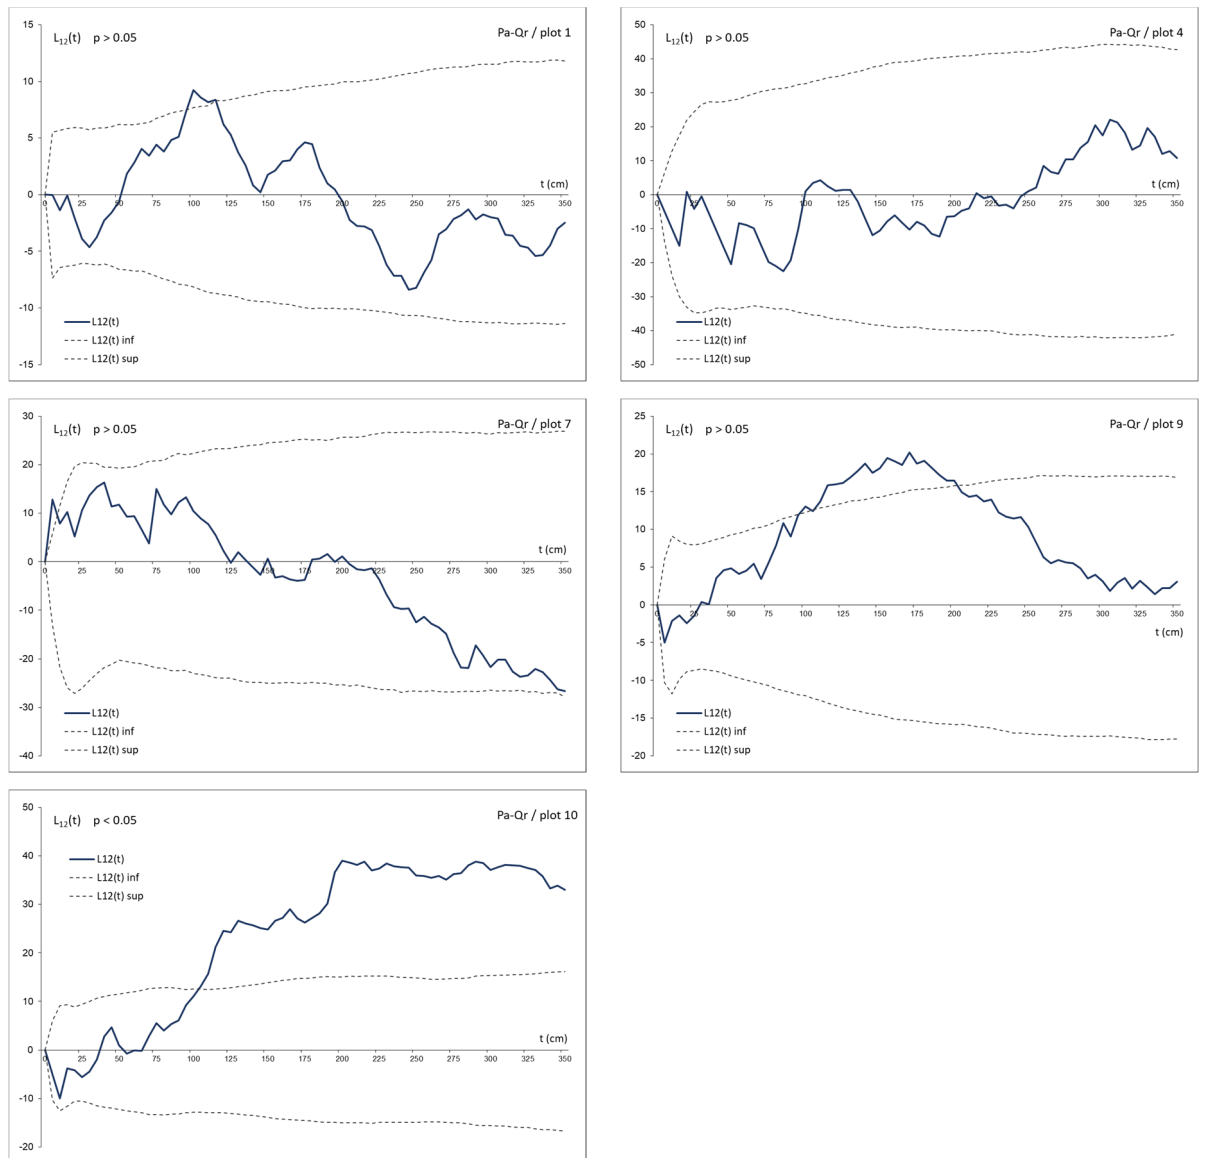

**Figure S46.** The bivariate  $L(t)$  function charts for Pa-Qr pair

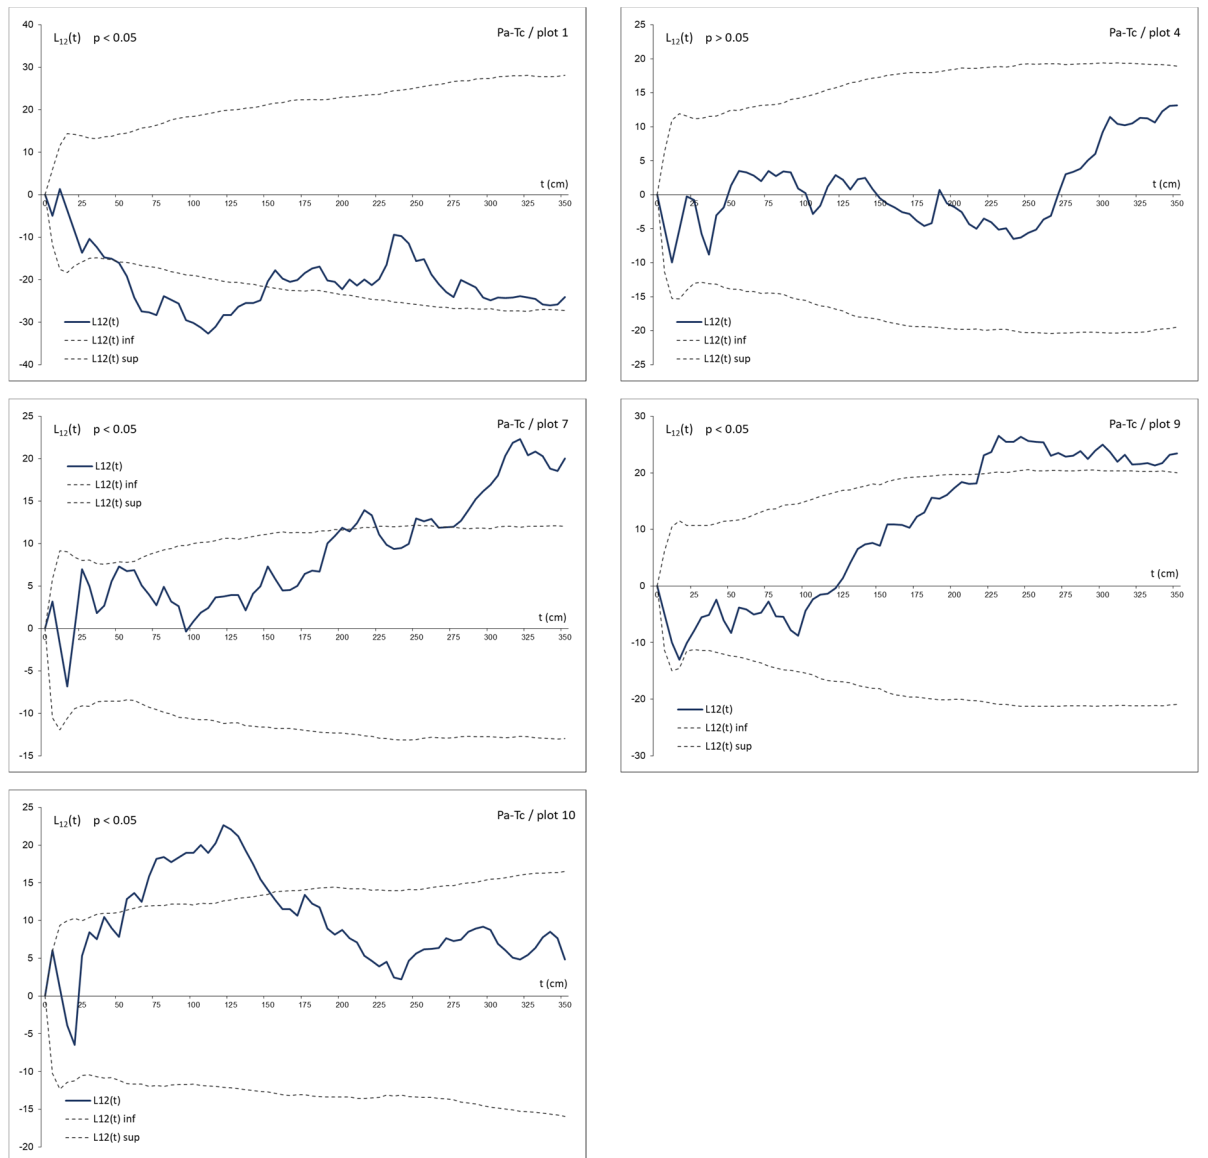

**Figure S47.** The bivariate  $L(t)$  function charts for Pa-Tc pair

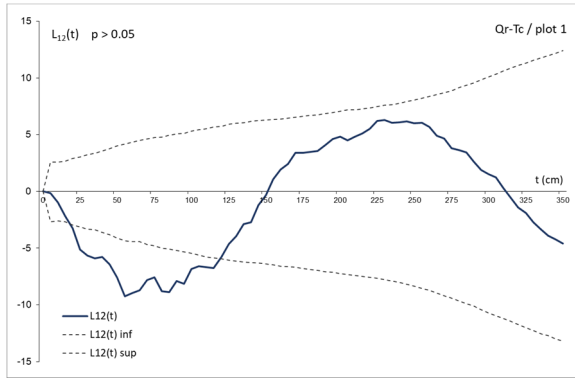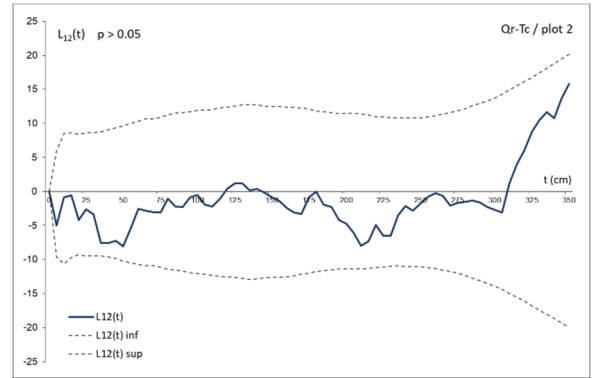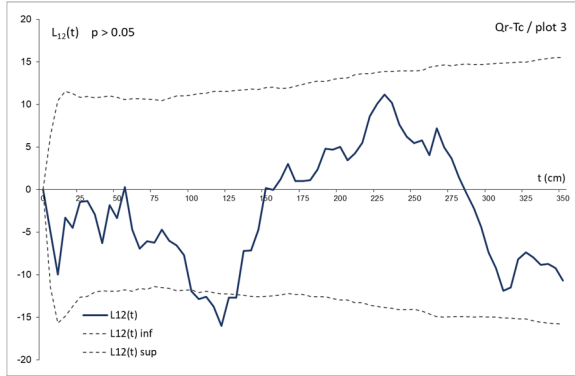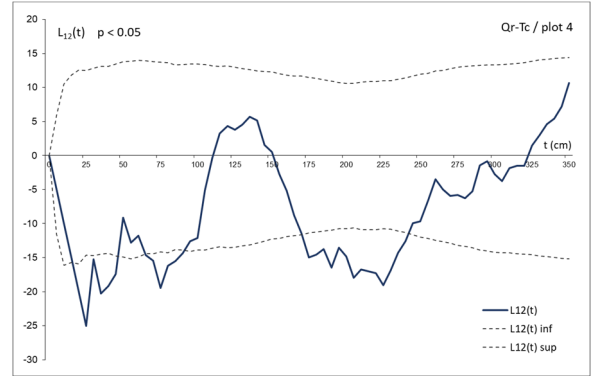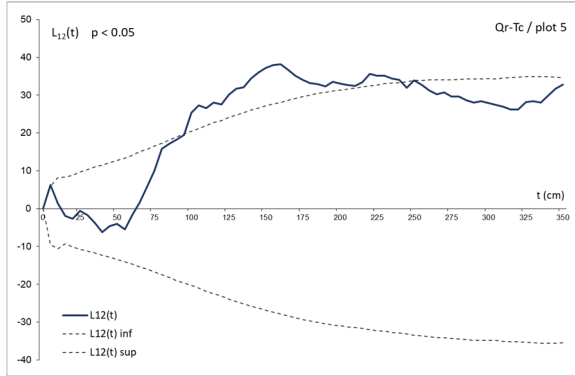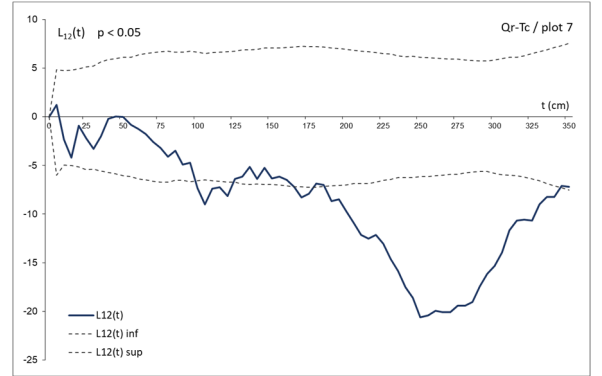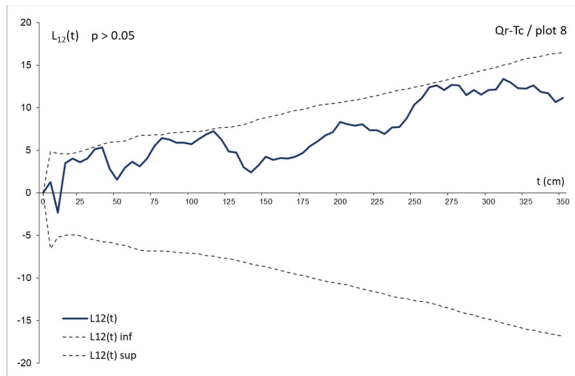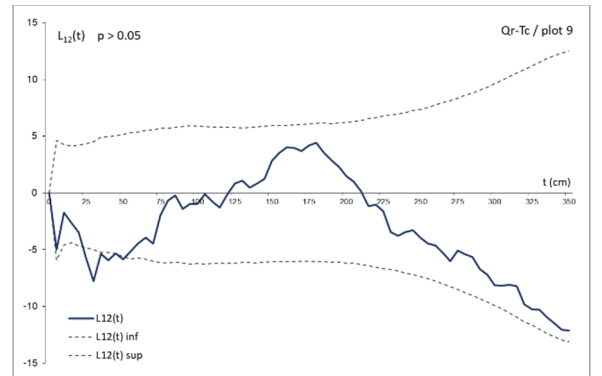

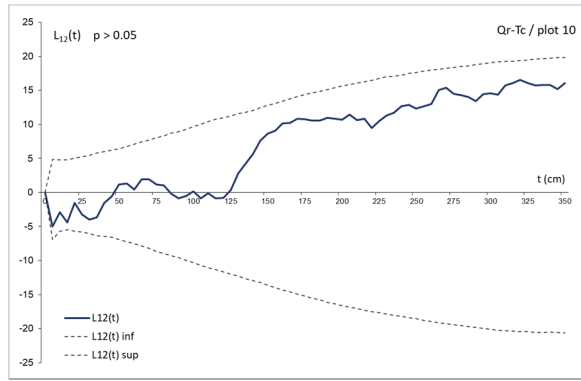

**Figure S48.** The bivariate  $L(t)$  function charts for Qr–Tc pair
